# Supplementary material for: Characterizing and Predicting Post-Acute Sequelae of SARS CoV-2 Infection (PASC) in a Large Academic Medical Center in the US
Source: MDPI journal article supplement (doi:10.3390/jcm12041328), 2023-02-07
Supplement: s1 [file s1]

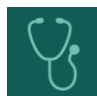

## SUPPLEMENTARY MATERIALS

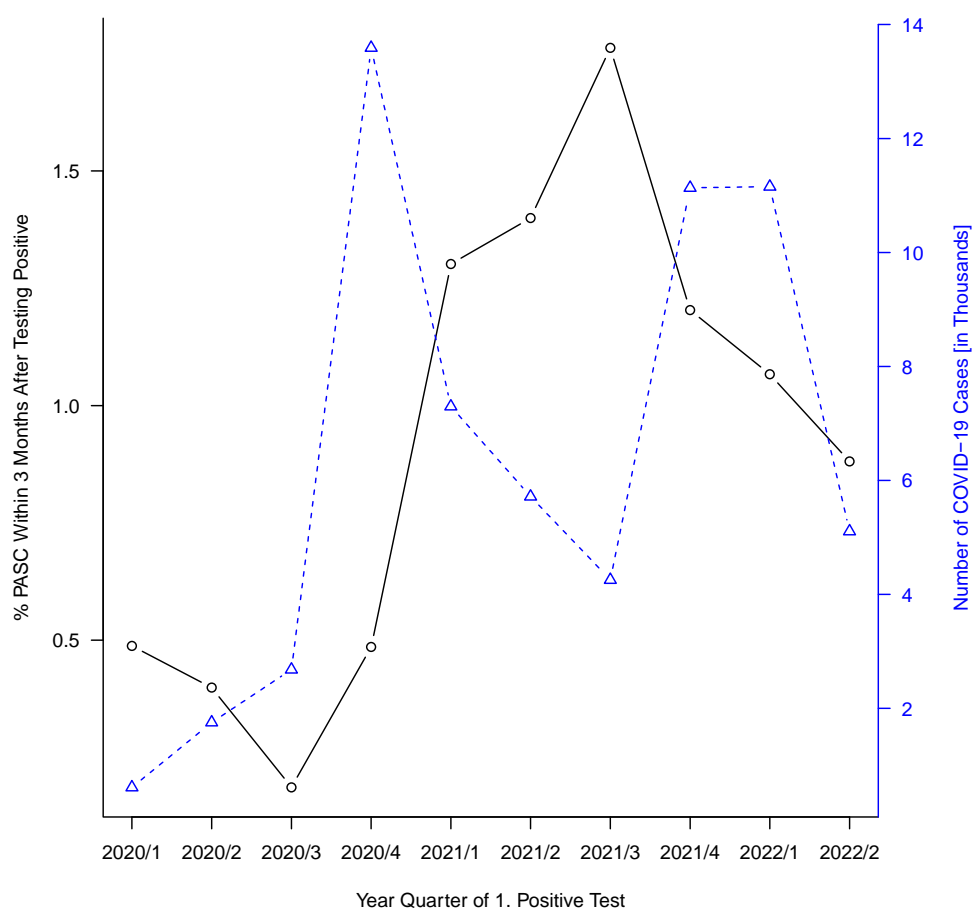

**Figure S1.** The proportion of clinically documented PASC within 3 months of testing positive and the number of total unmatched COVID-19-positive individuals by year quarter when they were tested positive/diagnosed for COVID-19 for the first time.

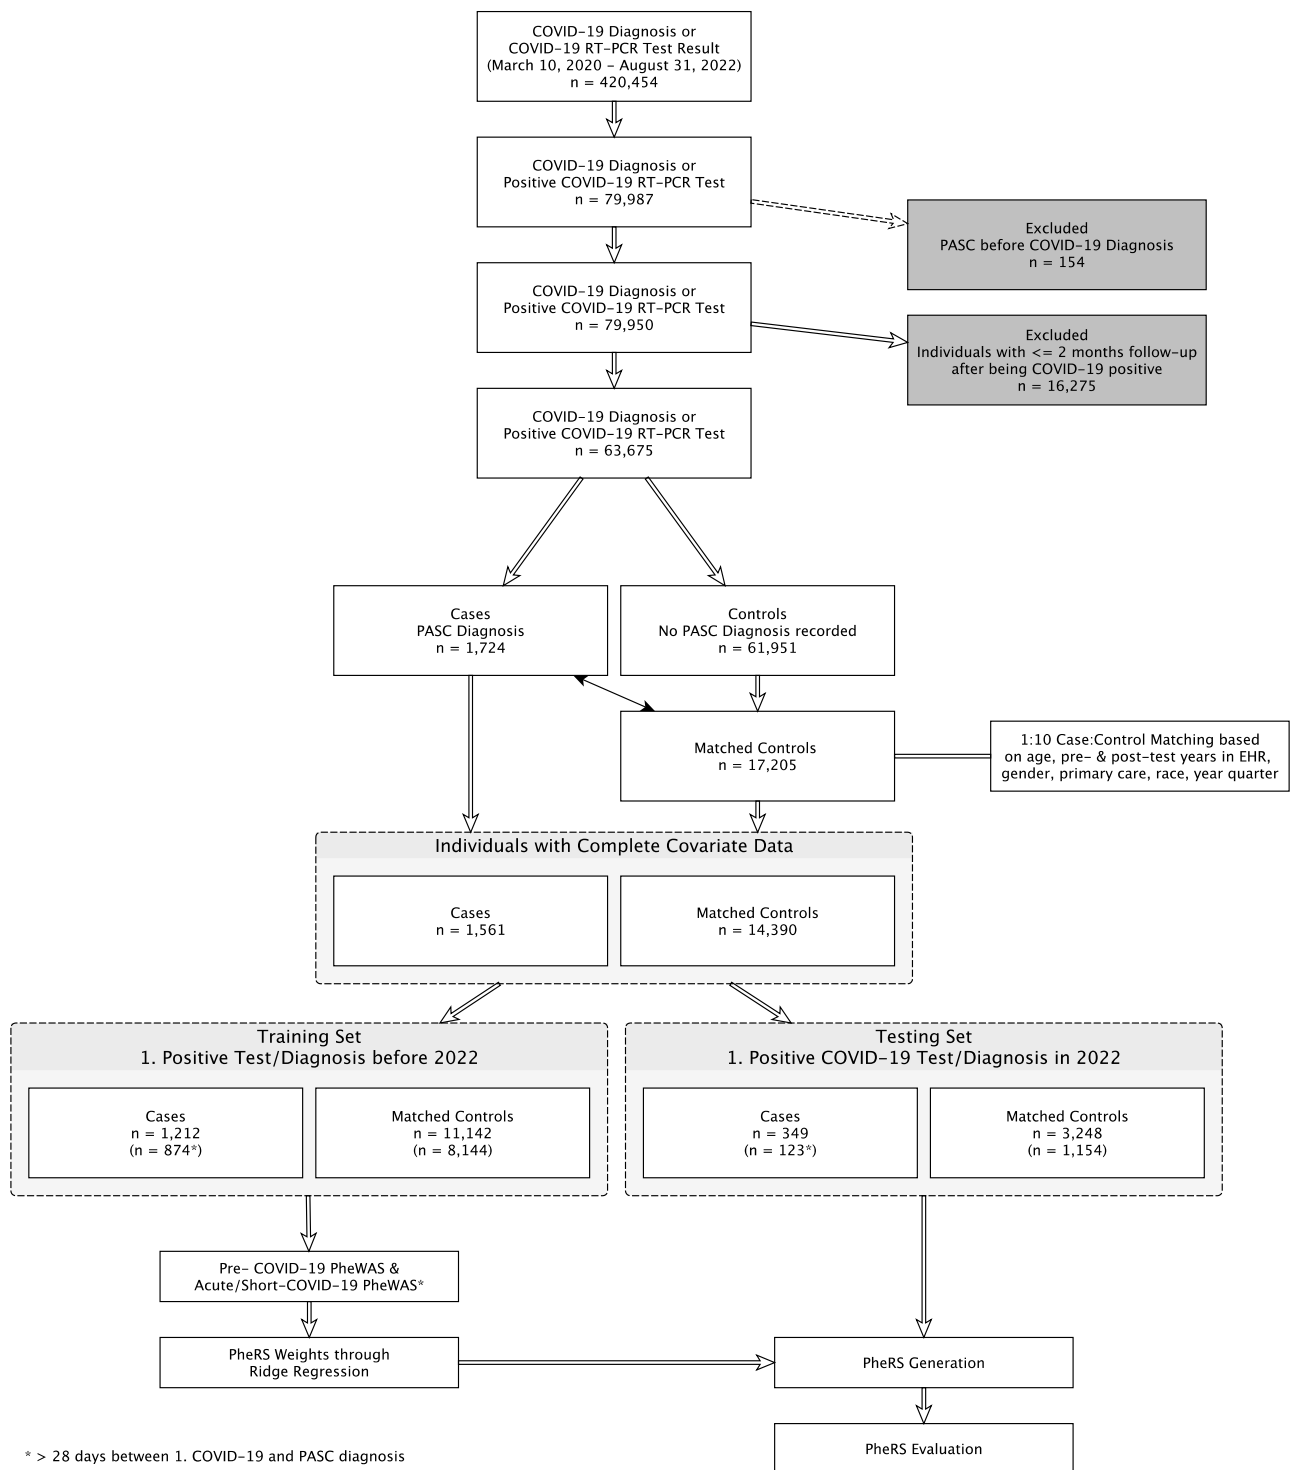

**Figure S2.** Overview flowchart showing the sample filtering and analysis setup.

A

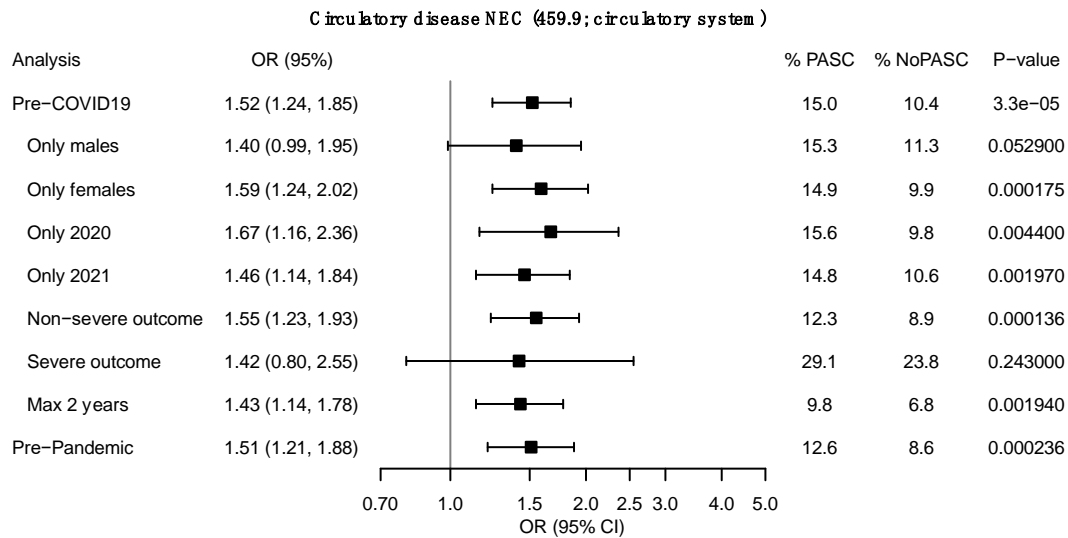

B

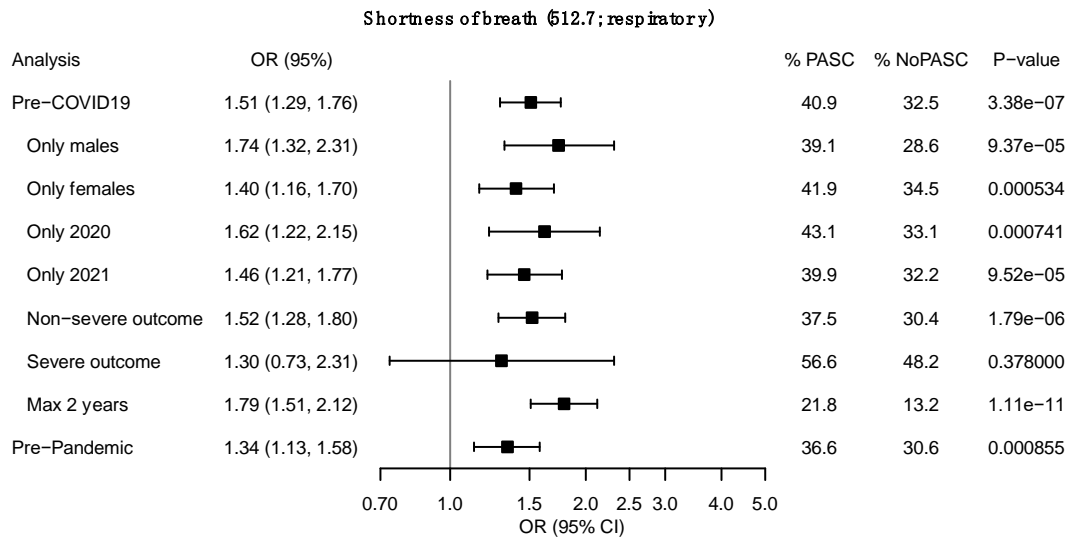

C

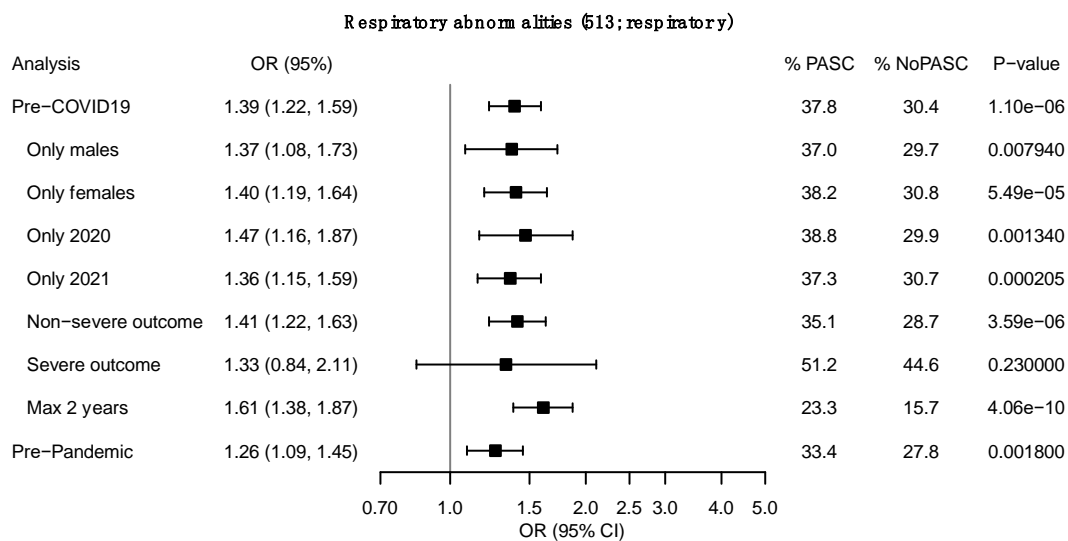

D

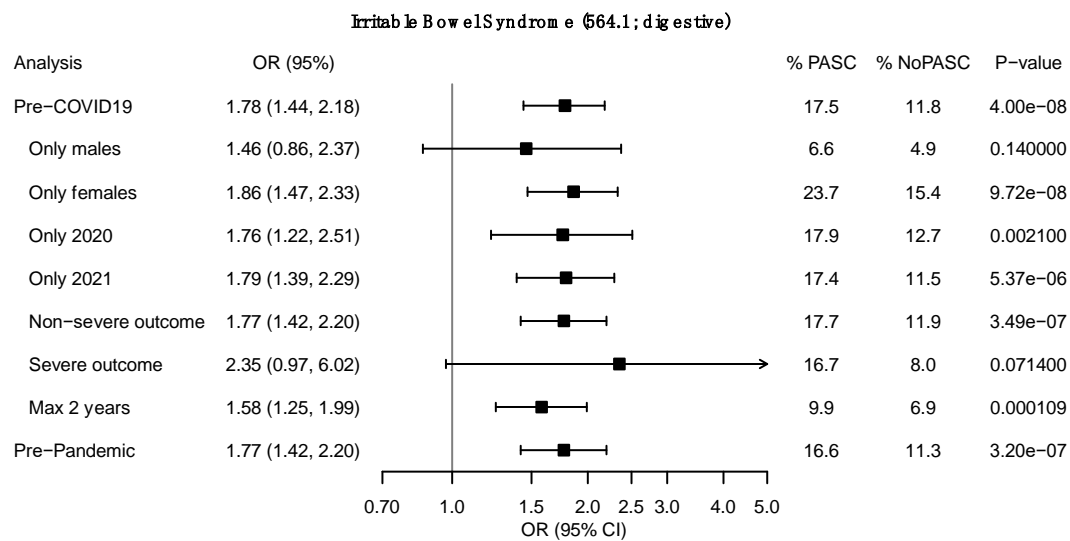

E

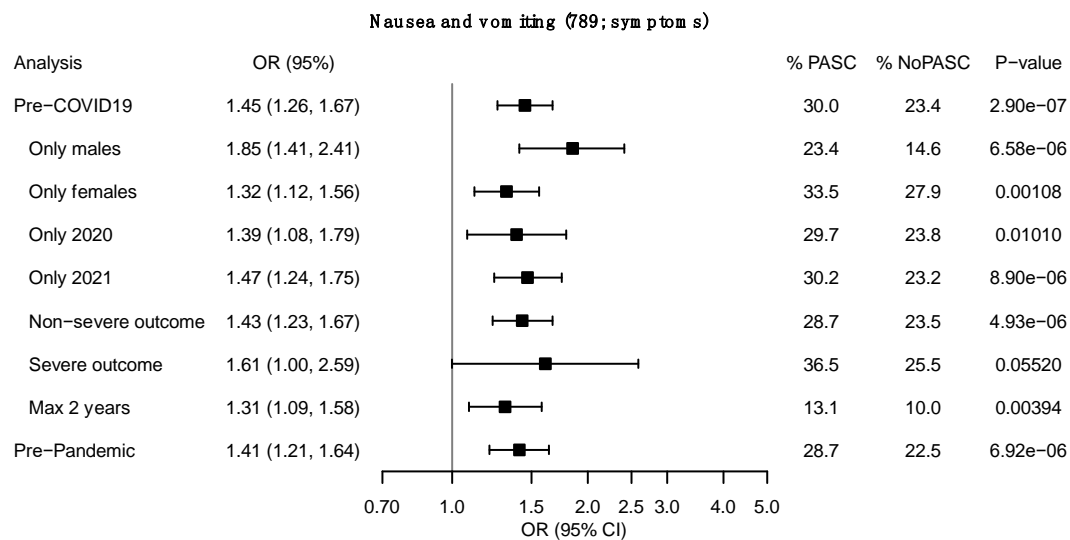

F

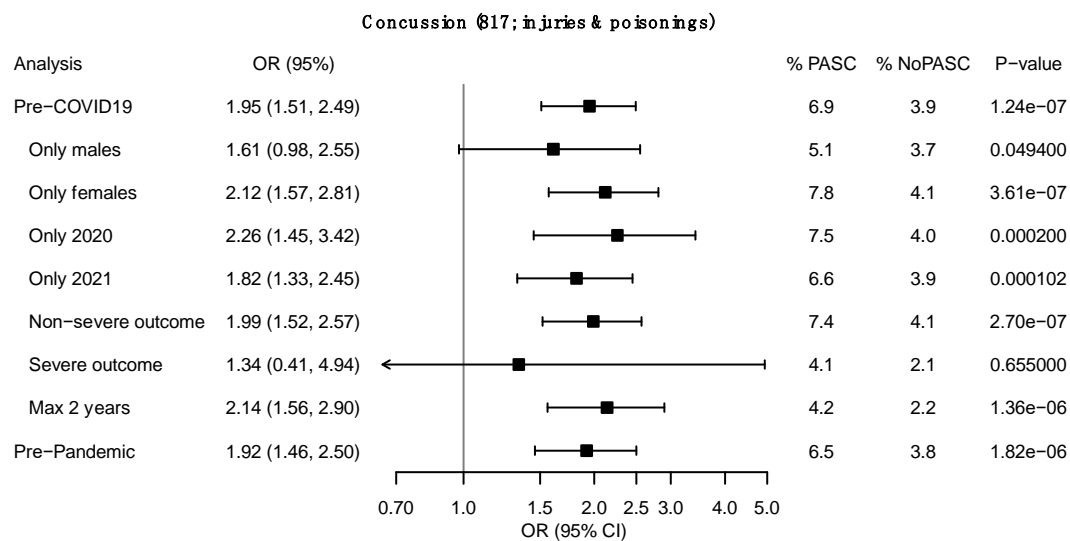

G

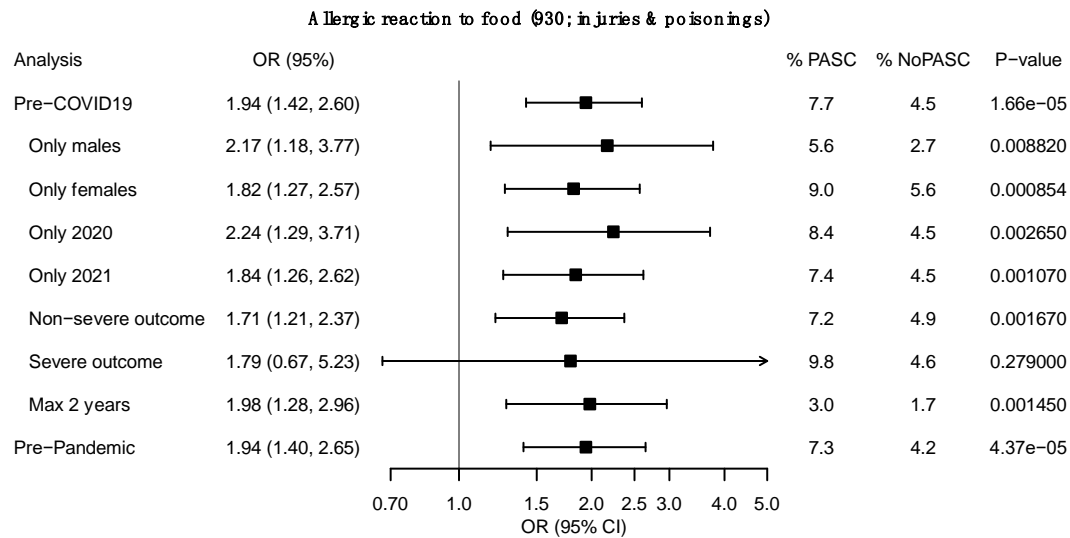

**Figure S3. A-G.** Forest plots of the PreCOVID-19 Sensitivity analyses. Effect sizes and PheCode frequencies in cases and controls of significantly associated PheCodes are shown. Pre-COVID-19: main analysis, only males, only females, COVID-19 positive in 2020, COVID-19 positive in 2021, non-severe COVID-19 outcome, severe COVID-19 outcome, max 2 years before COVID-19 diagnosis, and before 2020. Of significantly associated parent/child PheCodes only the phecode with the stronger association signal is shown. Sample sizes of each analysis can be found in **Table S5**.

A

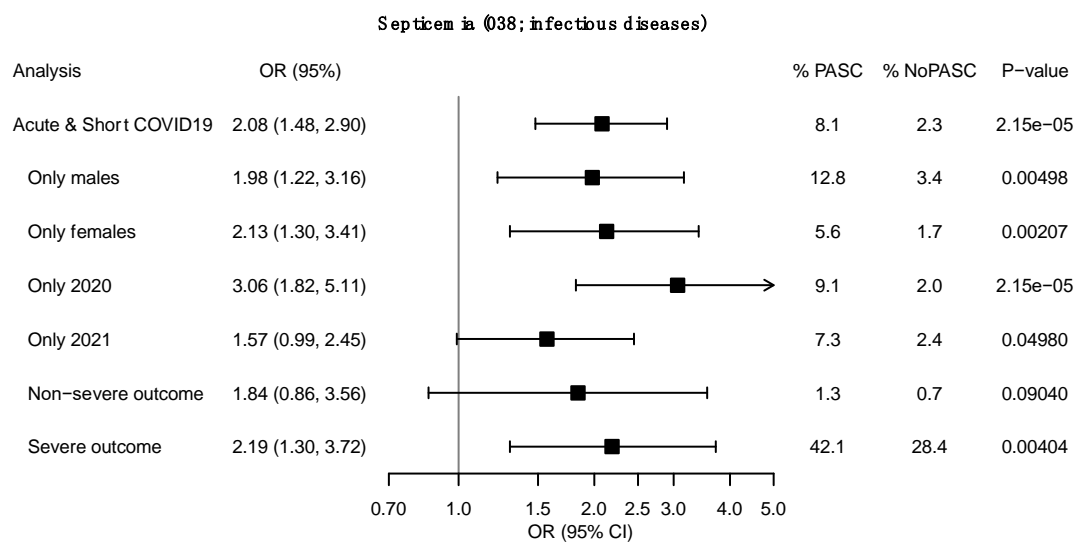

B

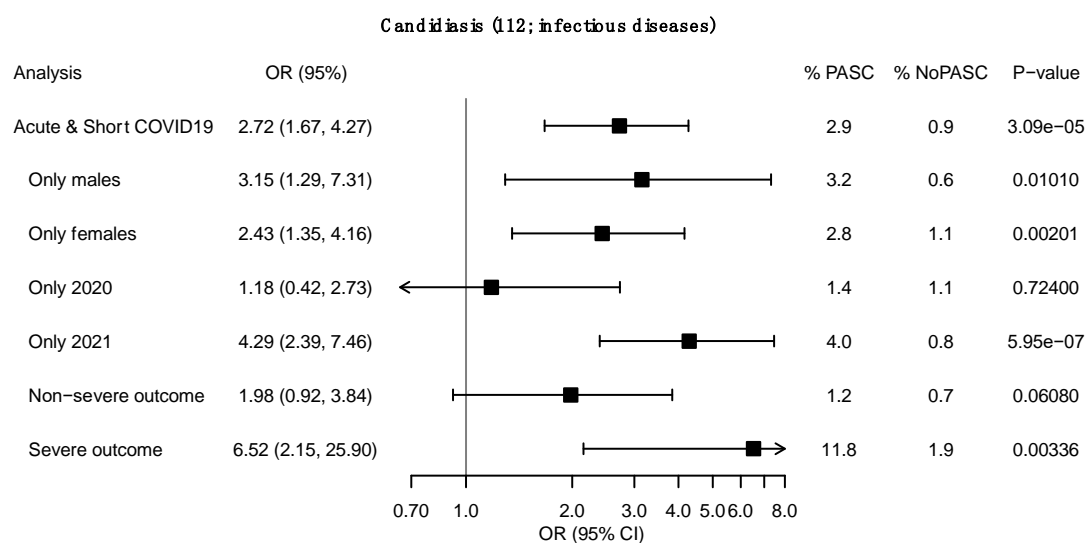

C

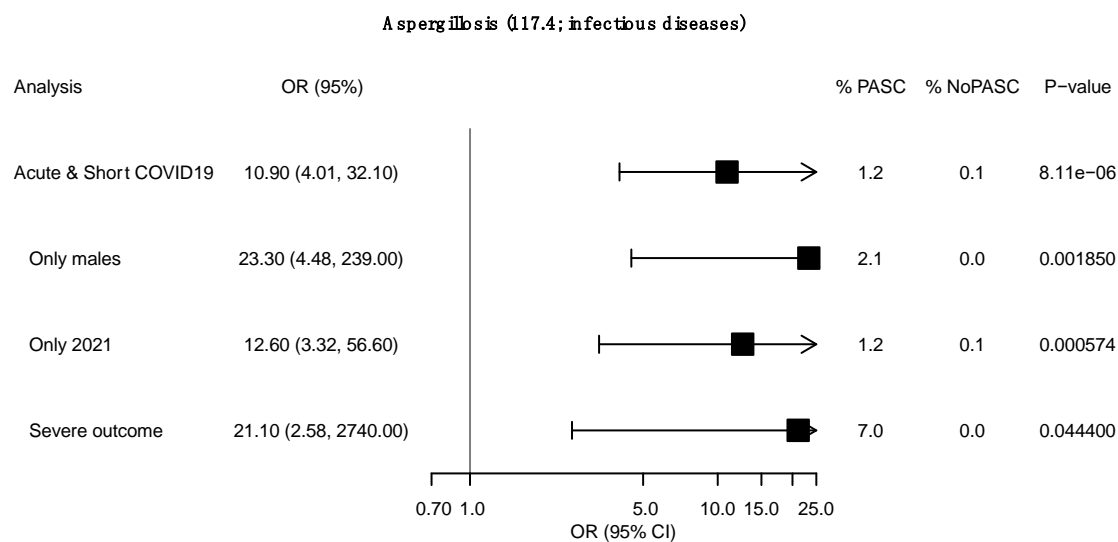

D

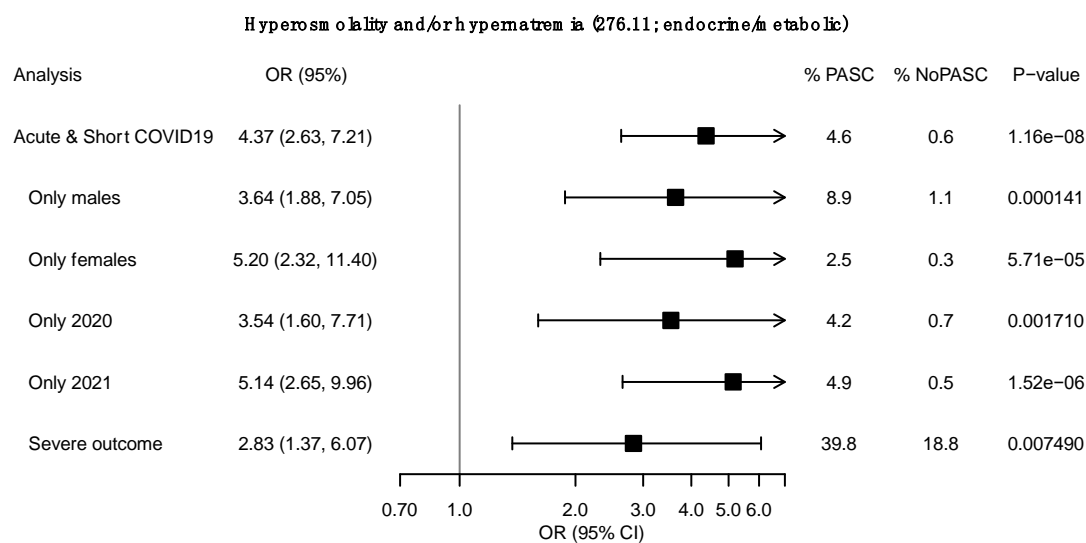

E

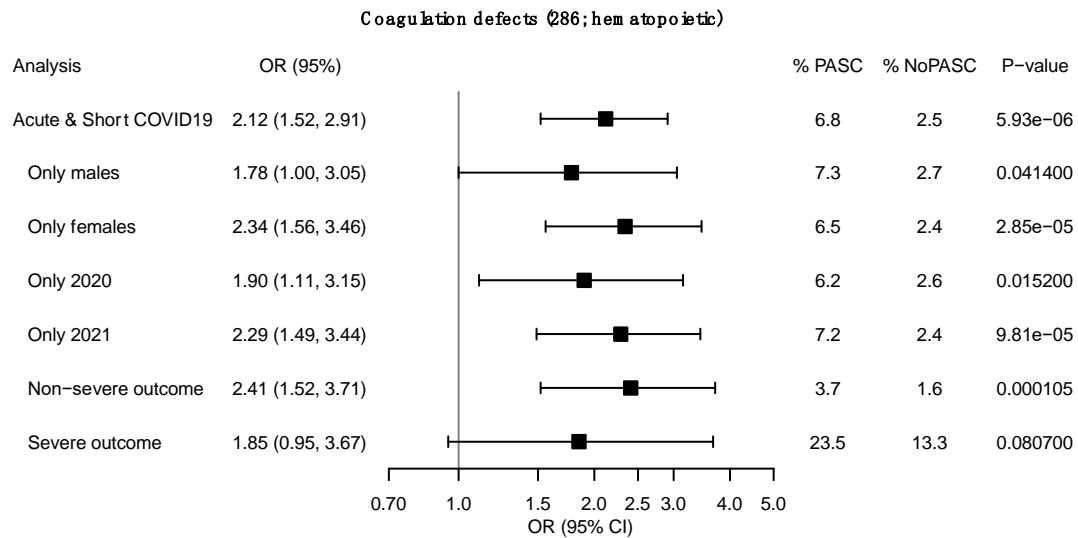

F

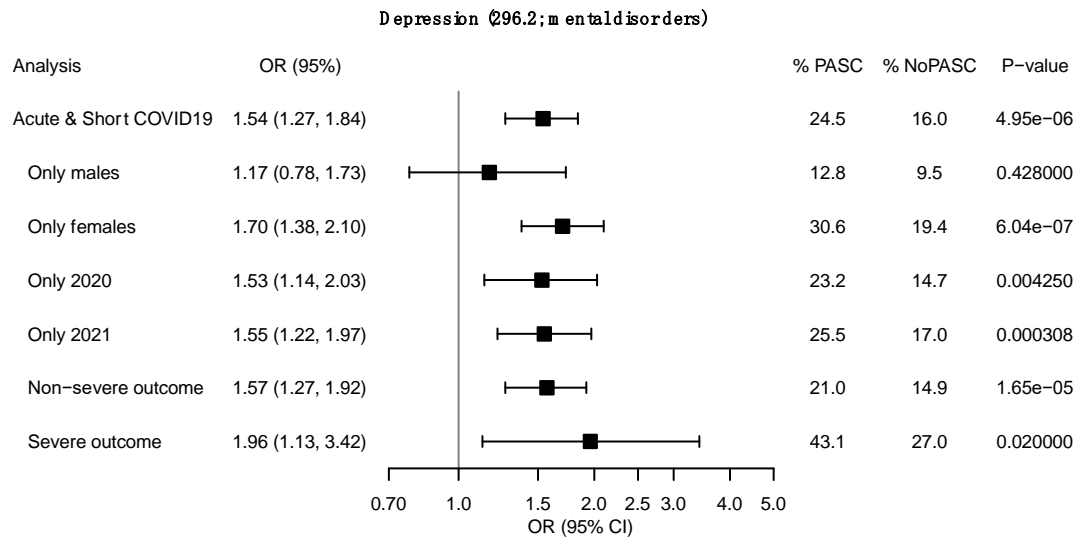

G

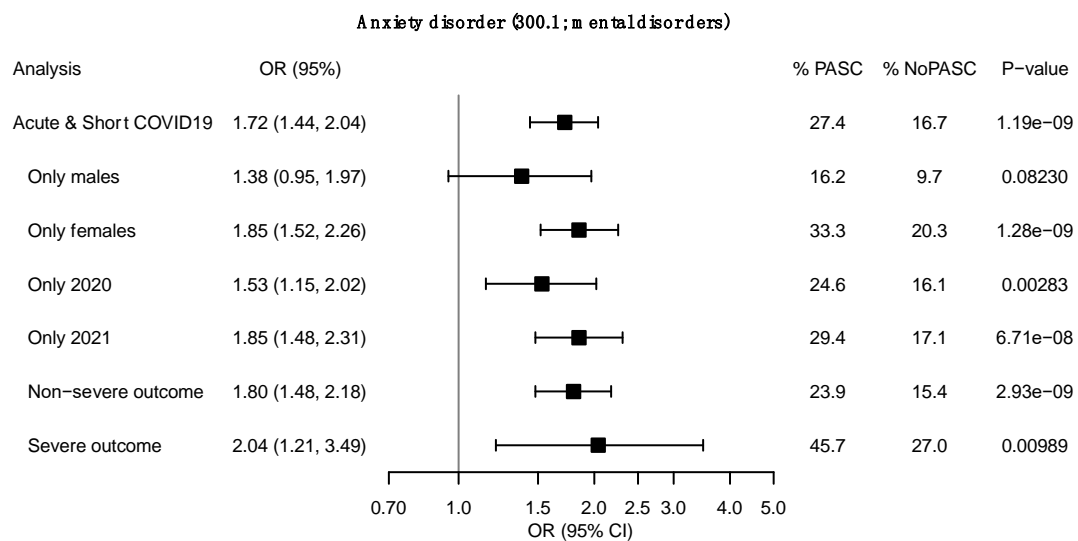

H

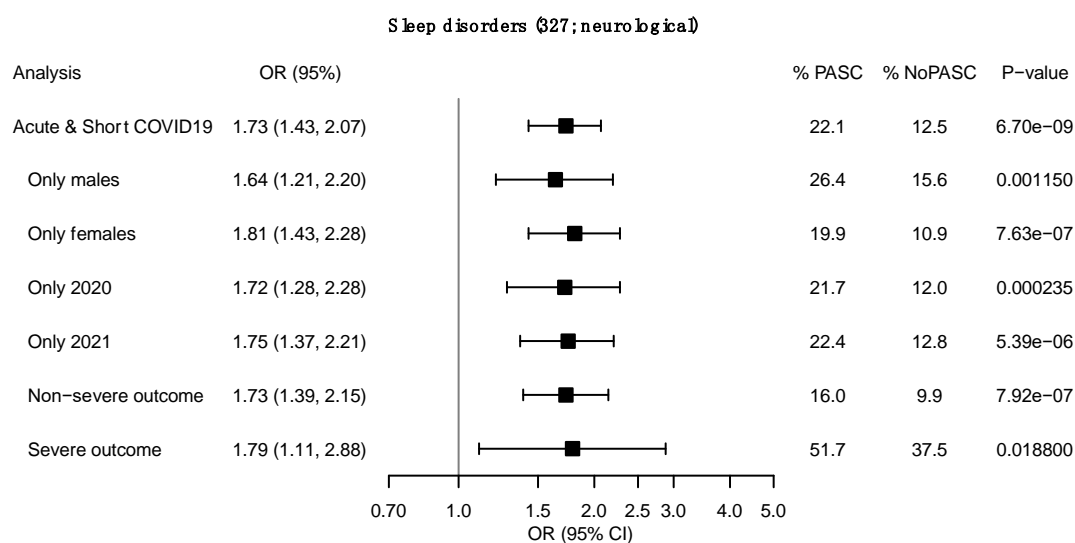

I

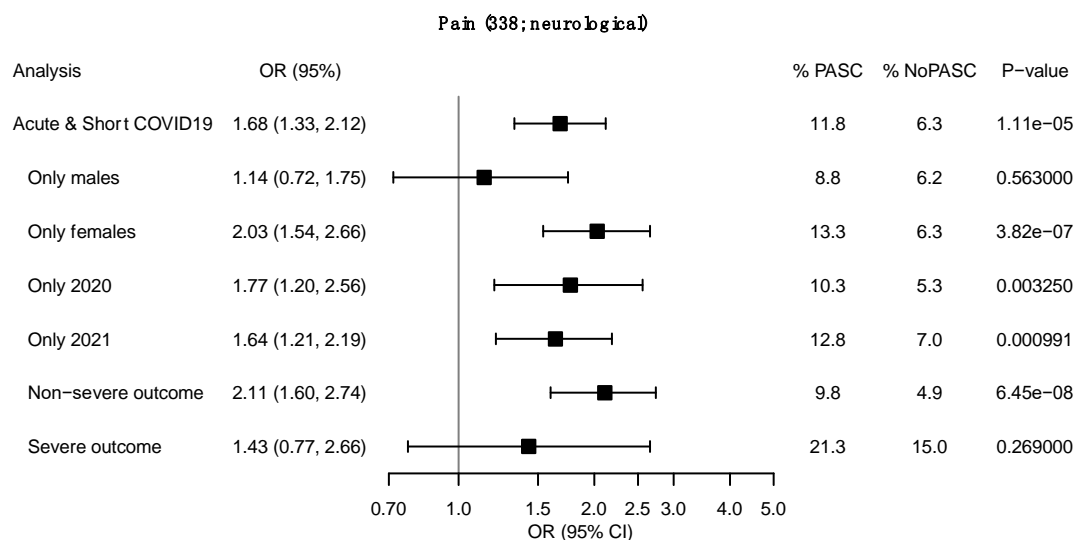

J

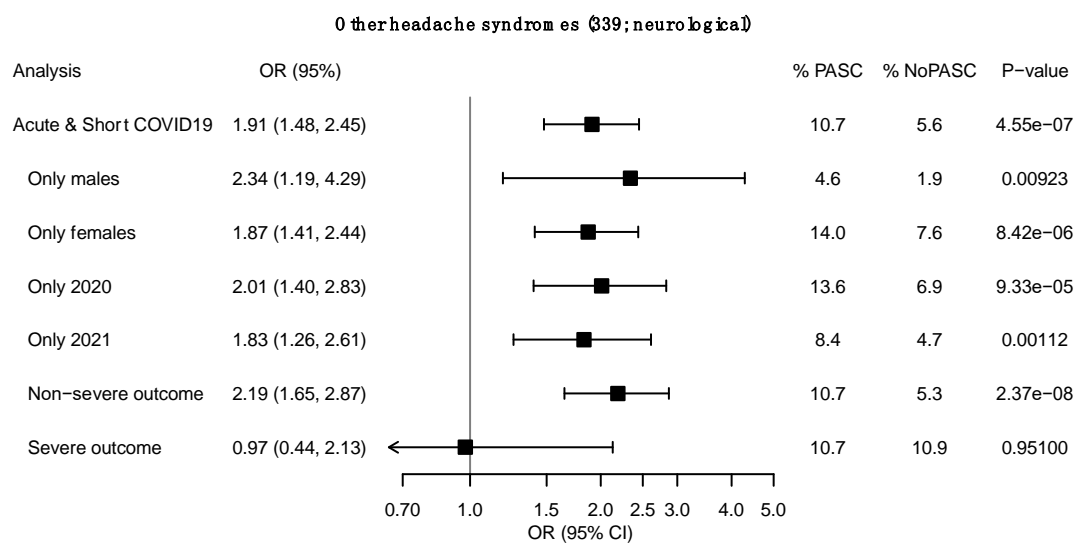



K

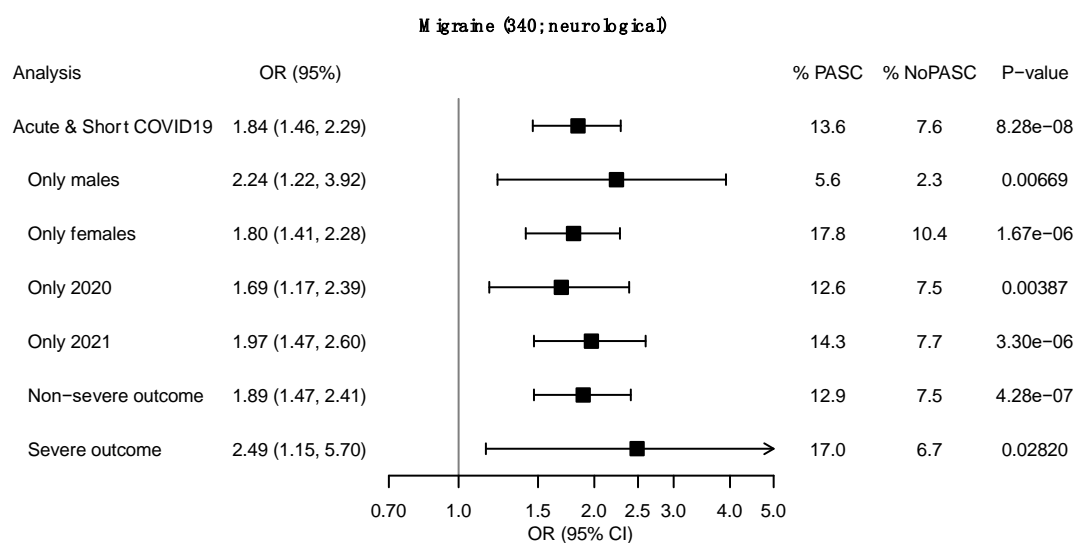

L

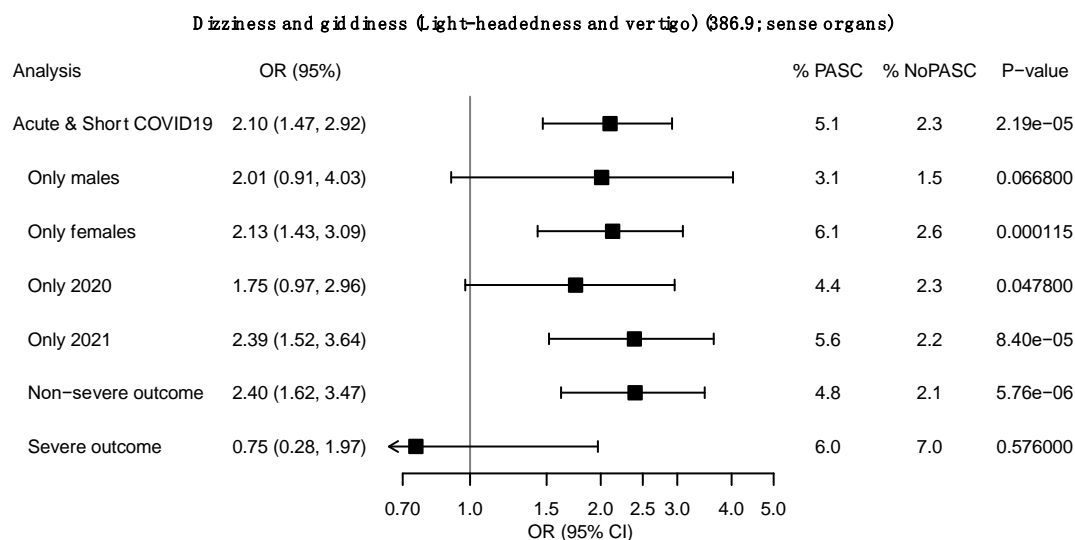

M

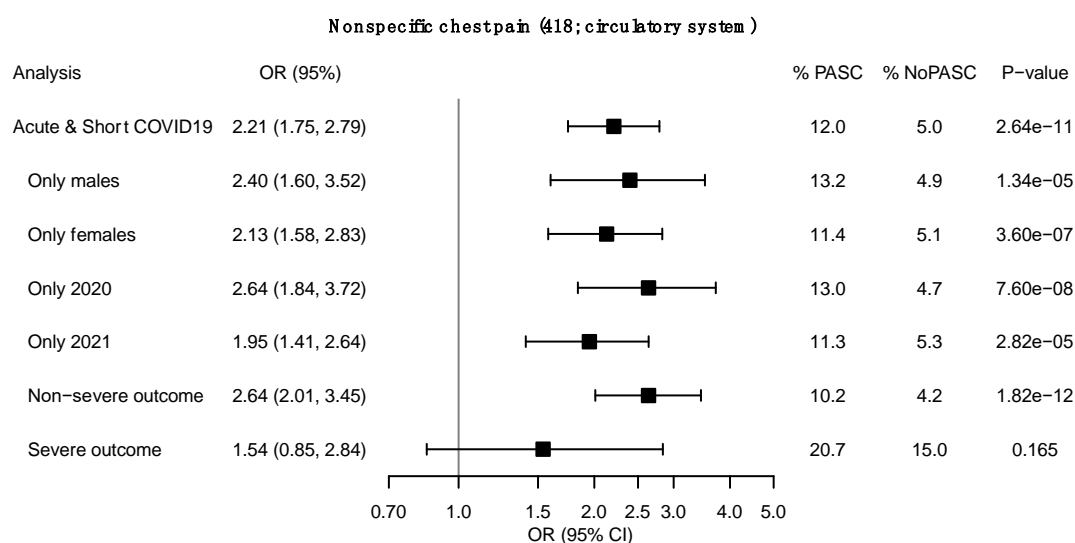

N

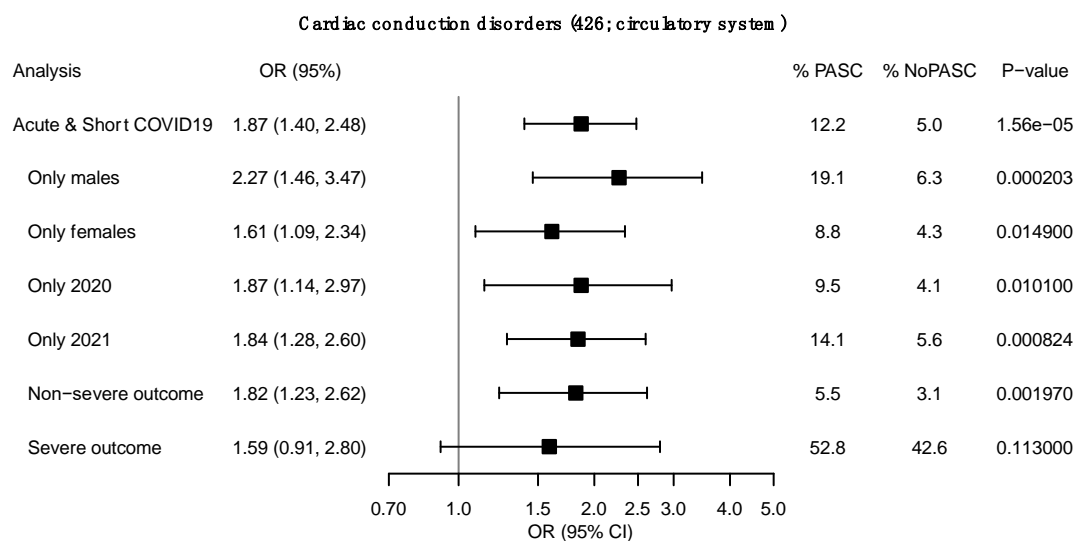

O

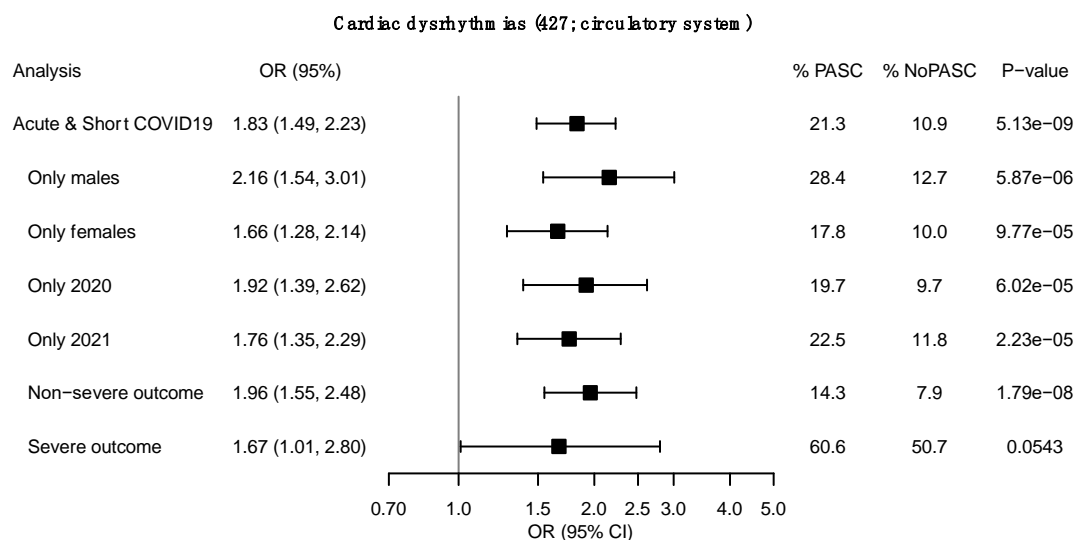

P

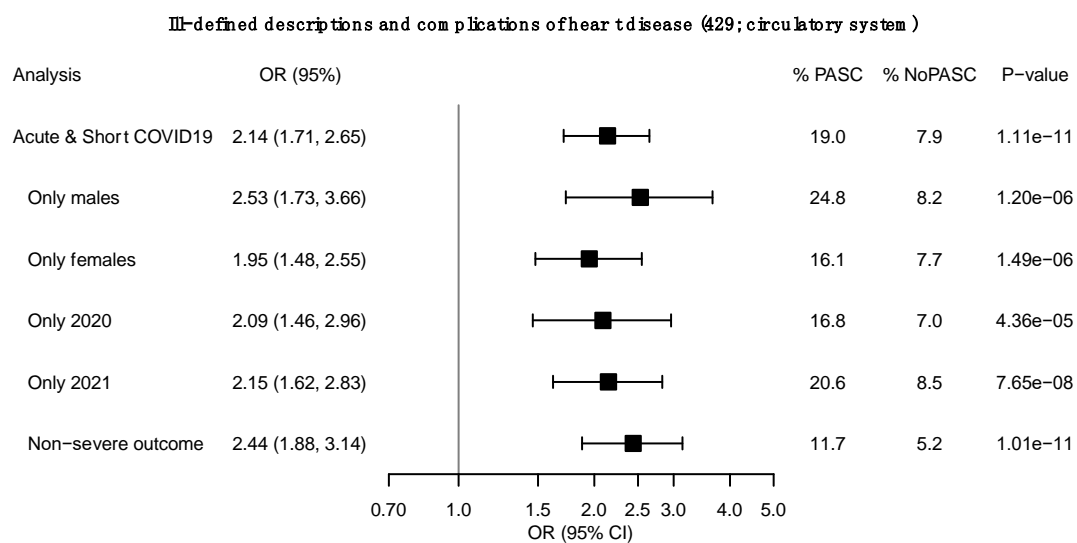

Q

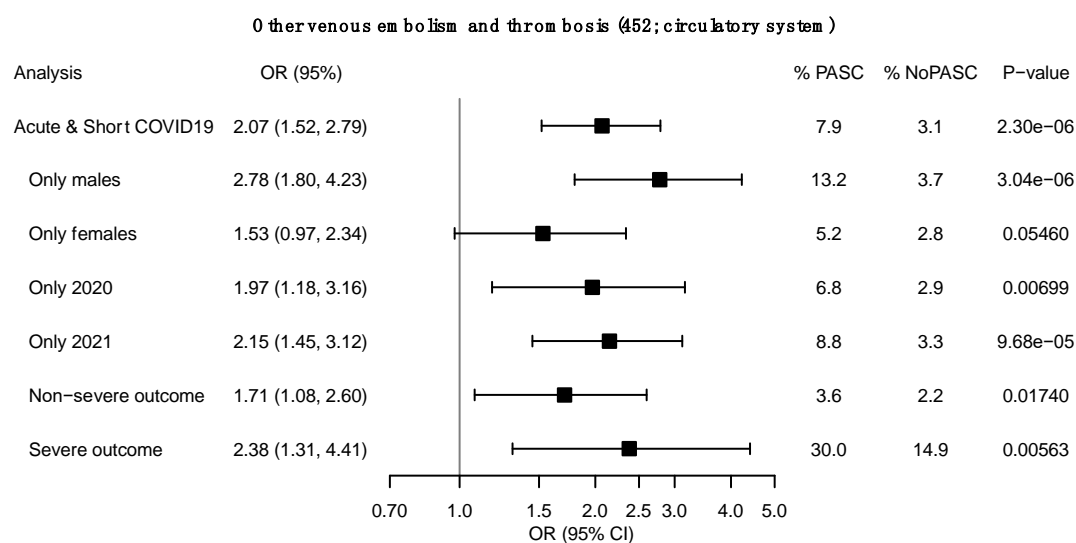

R

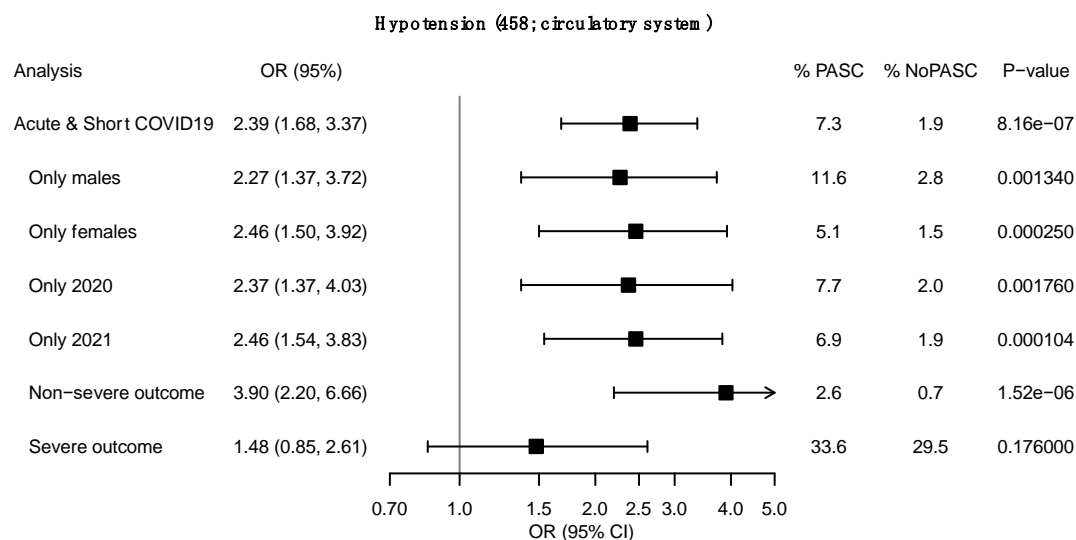

S

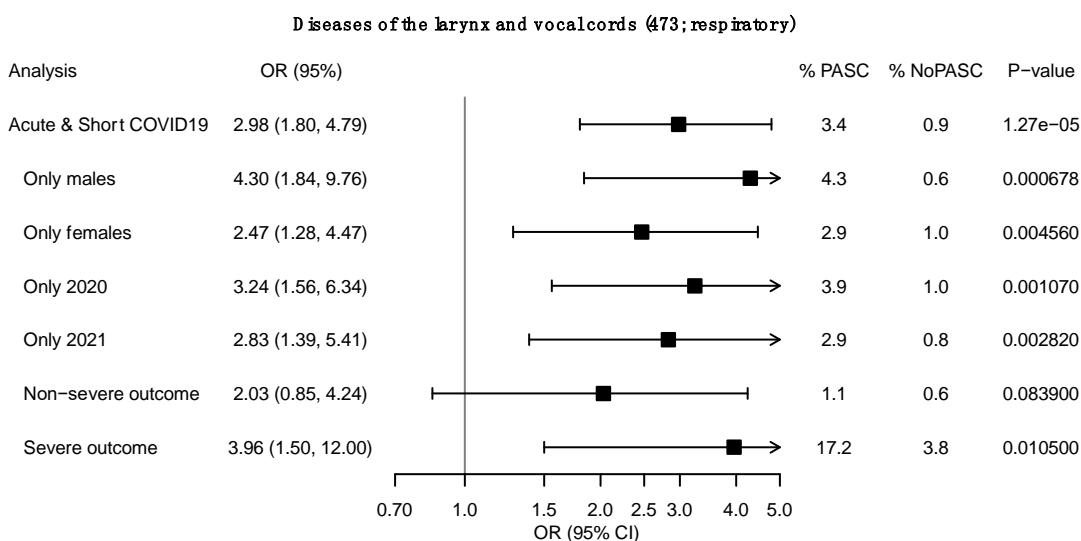

T

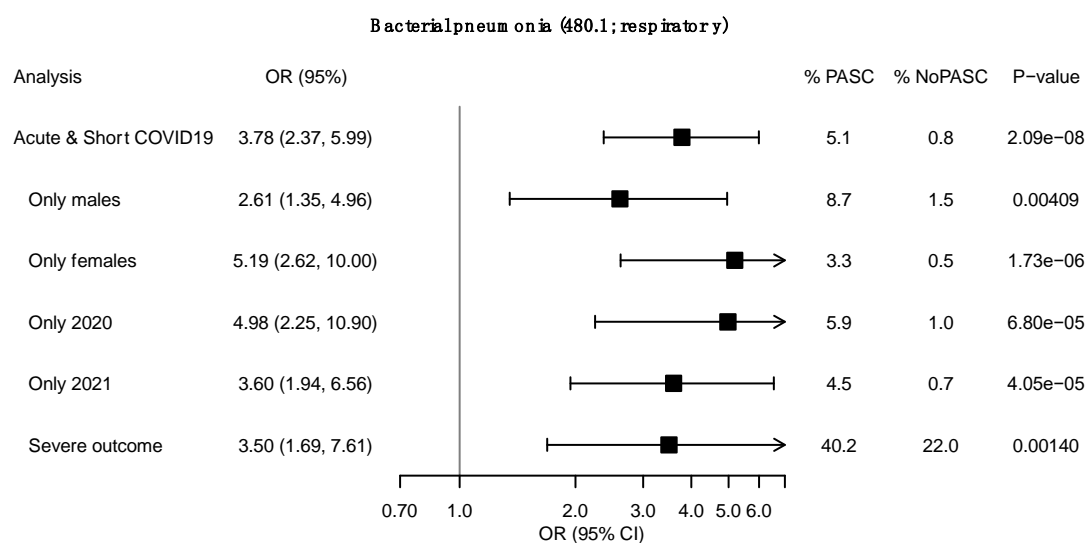

U

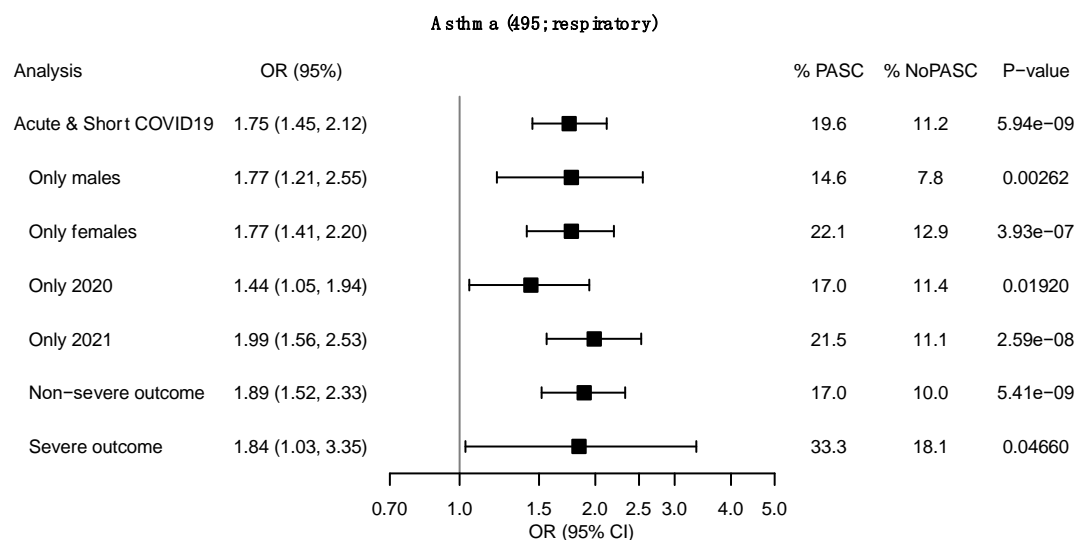

V

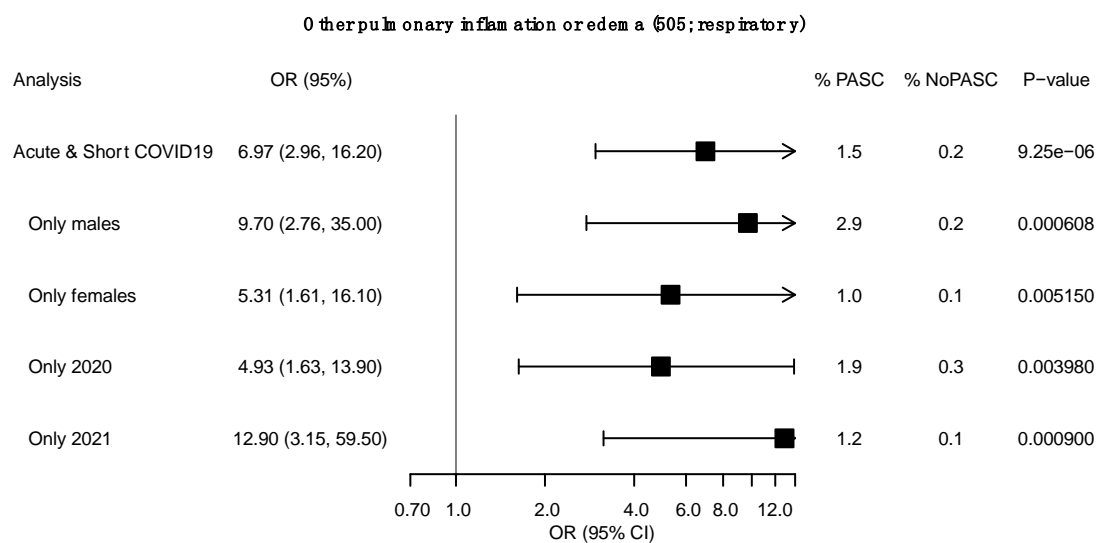

W

**Em pyem a and pneum othorax (506; respiratory)**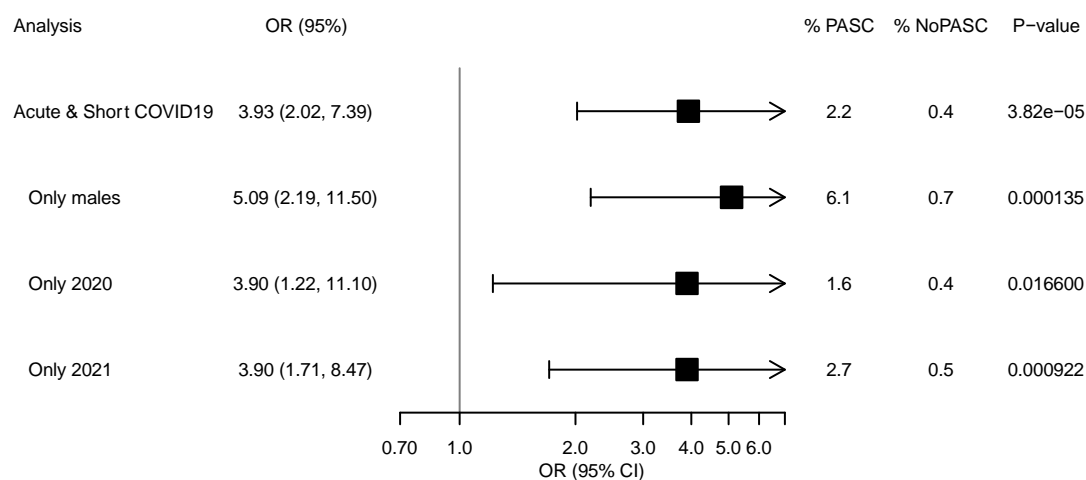

X

**P leurisy; pleura effusion (507; respiratory)**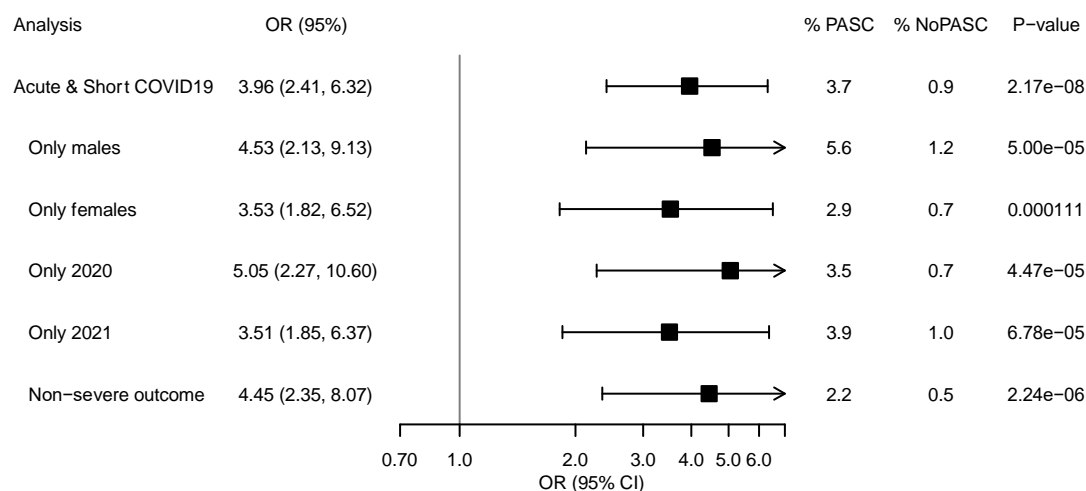

Y

**Pu lmonary collapse; interstitial and compensatory em physem a (508; respiratory)**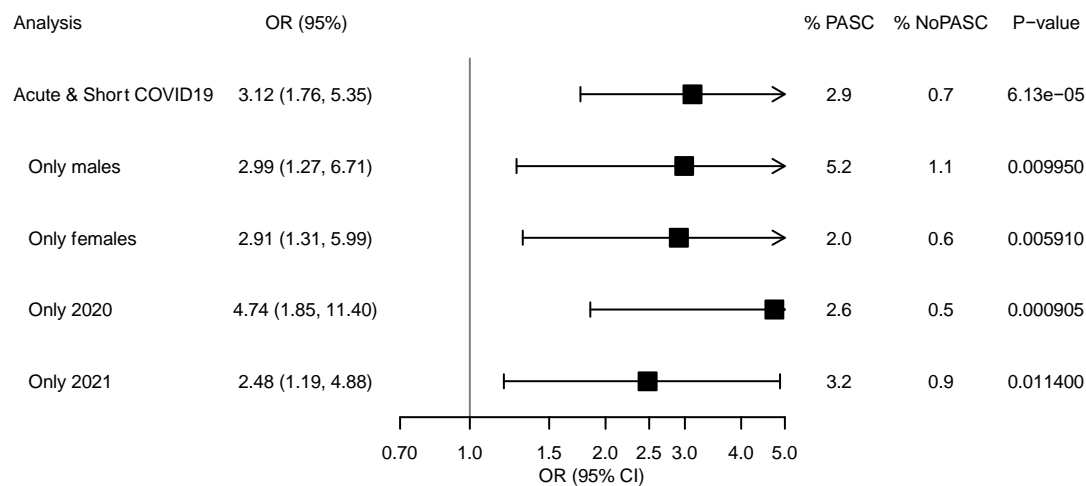

Z

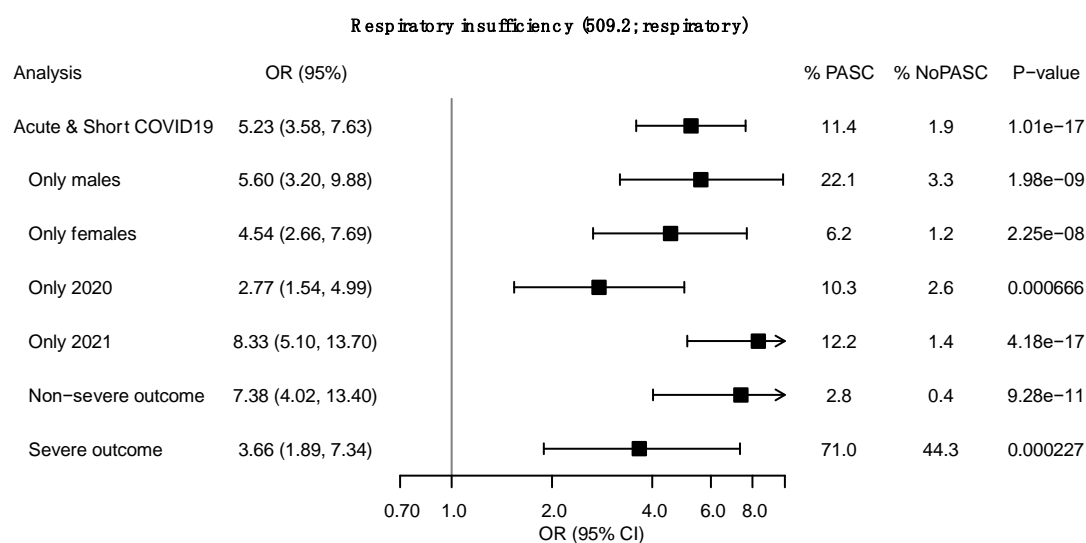

AA

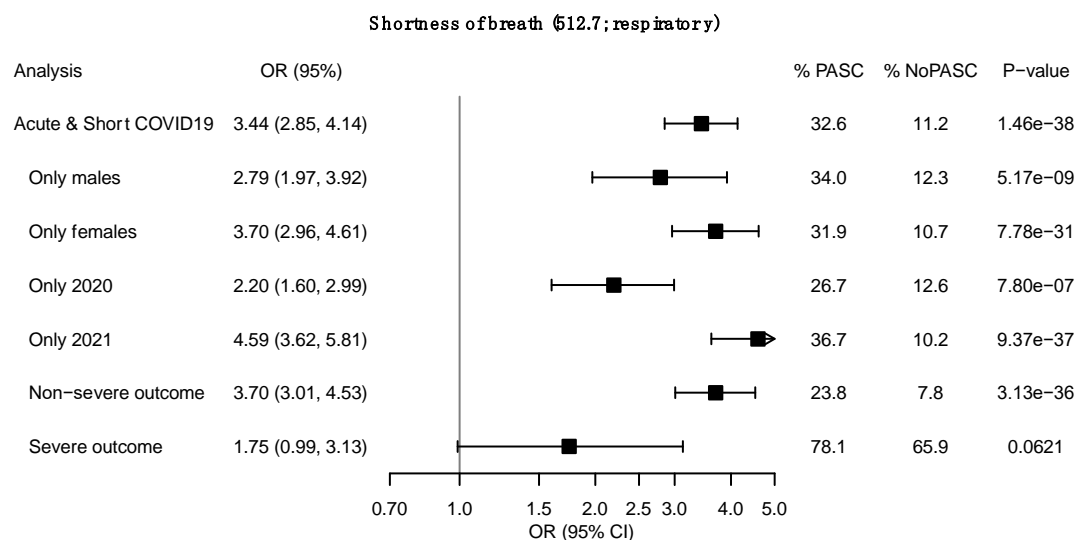

AB

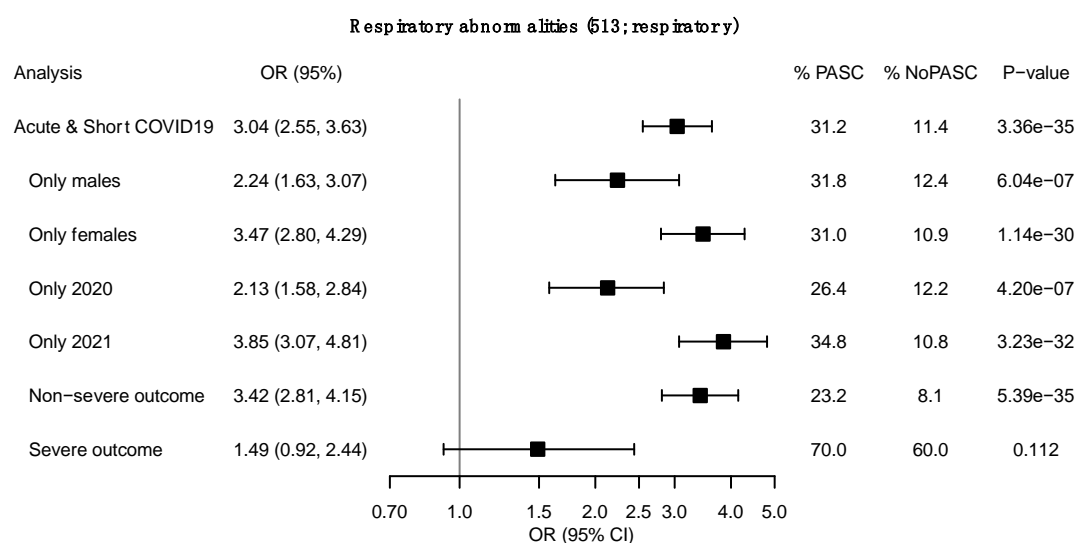

## AC

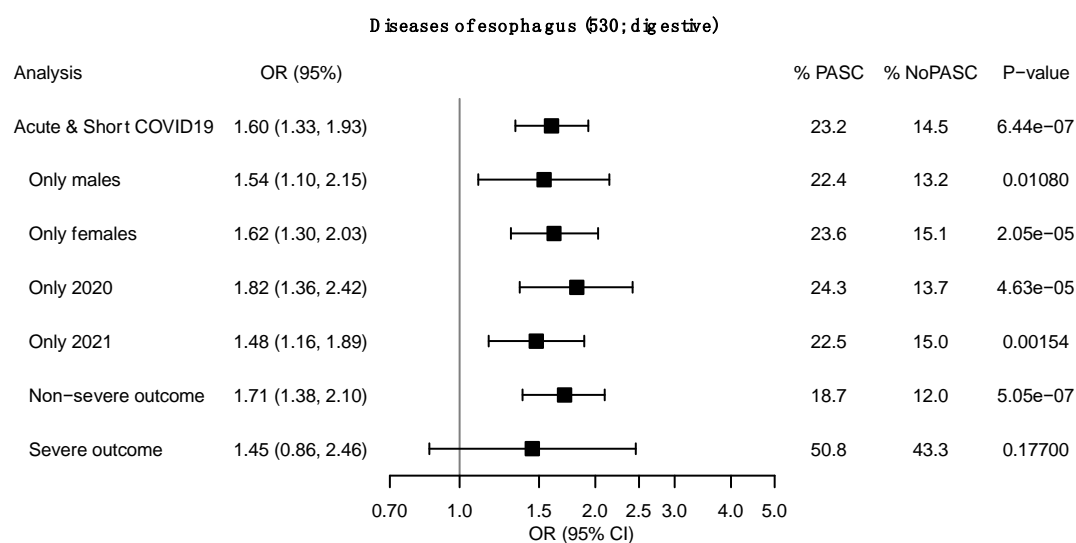

## AD

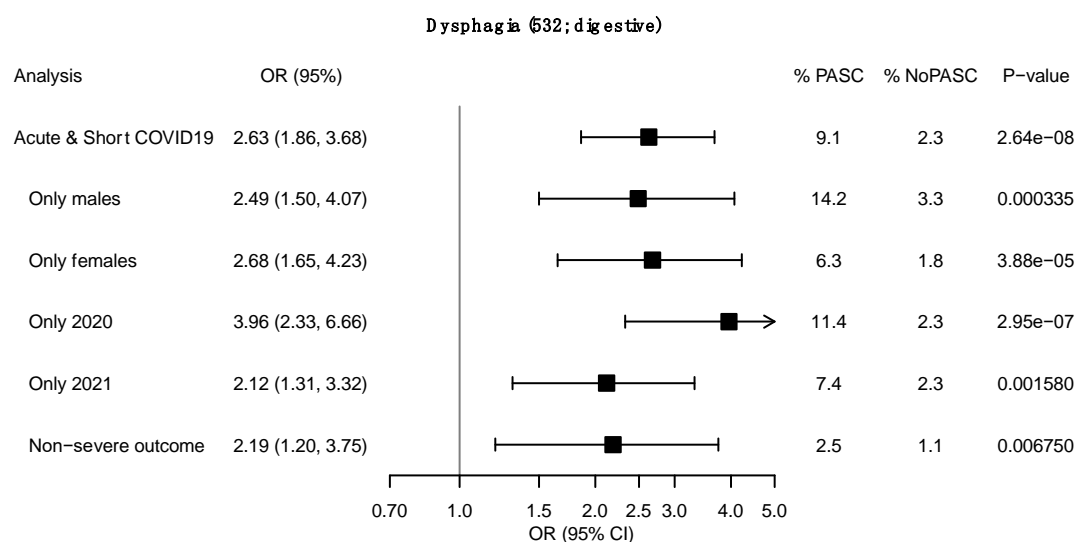

## AE

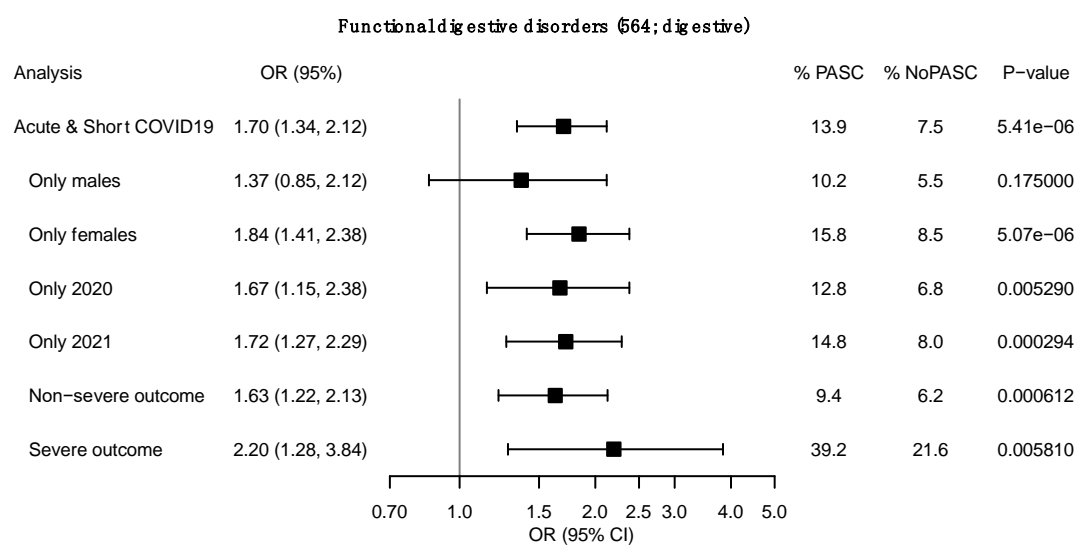

AF

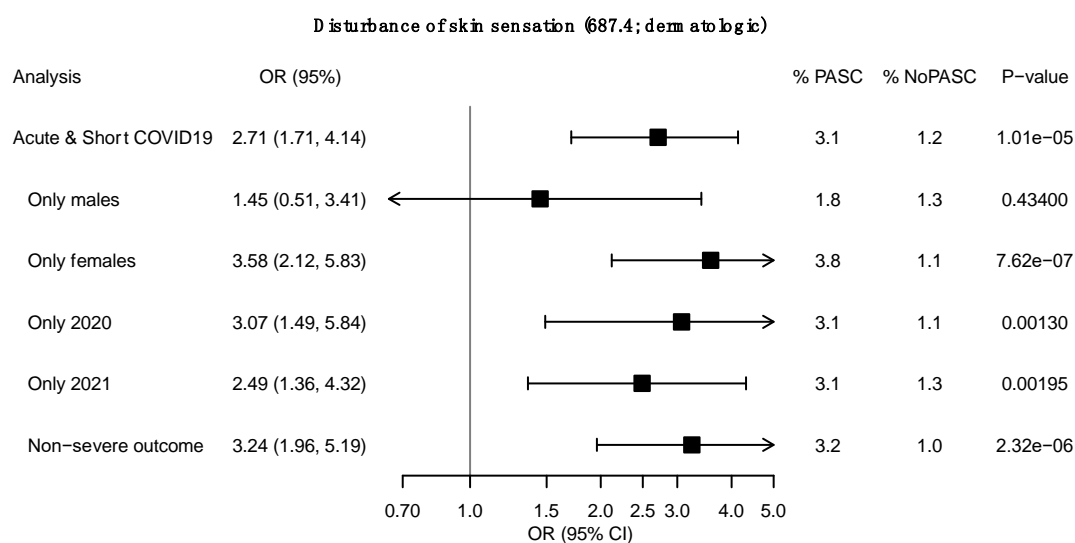

AG

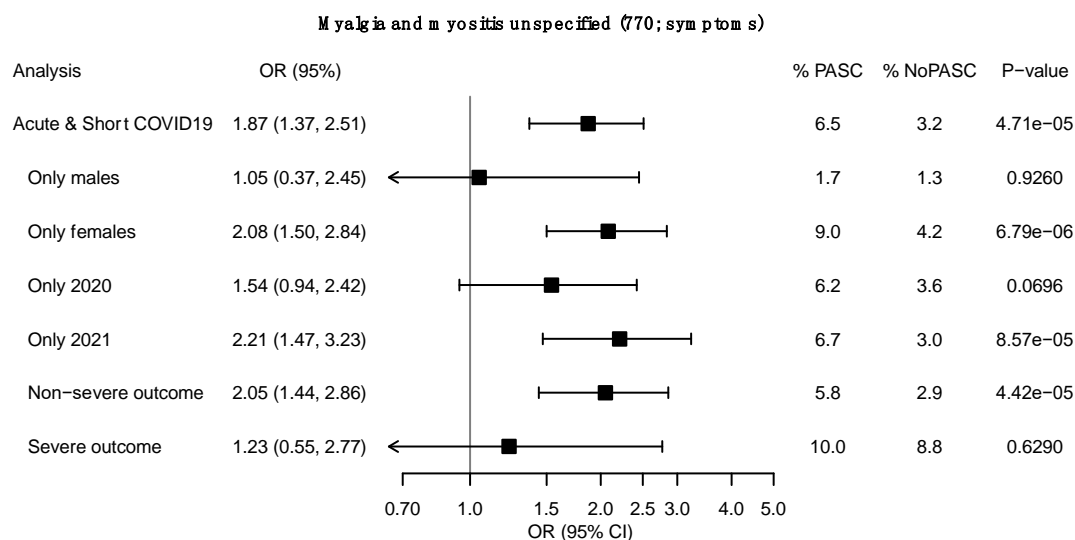

AH

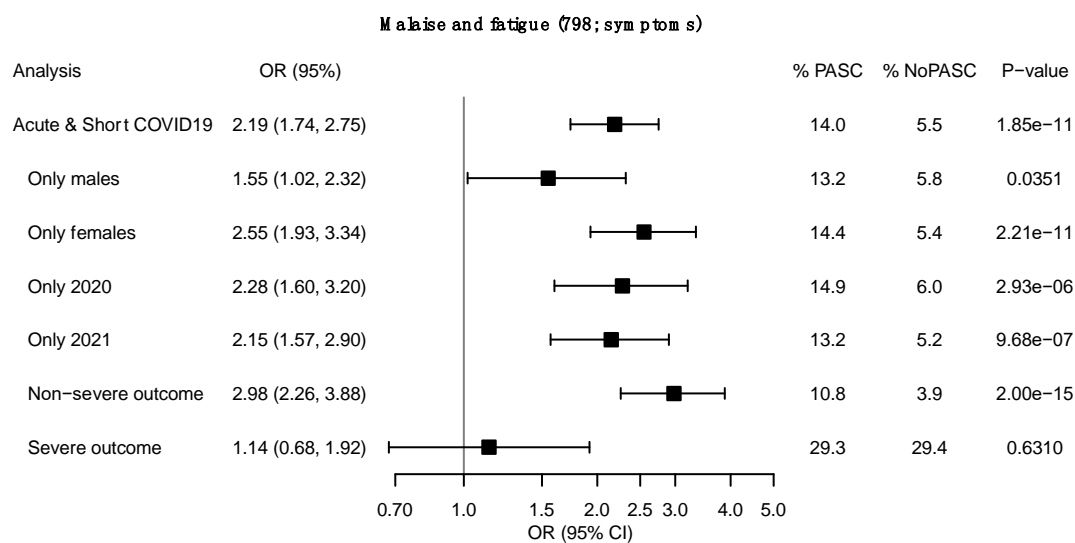



AI

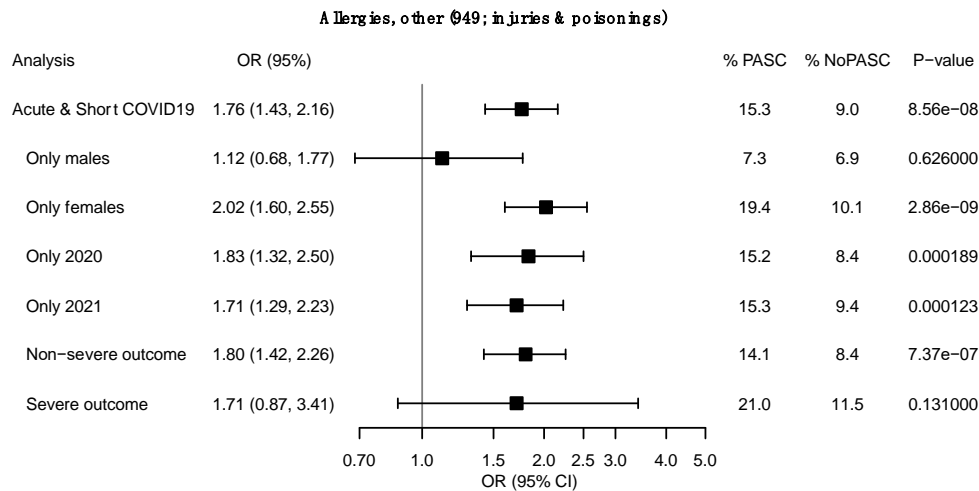

AJ

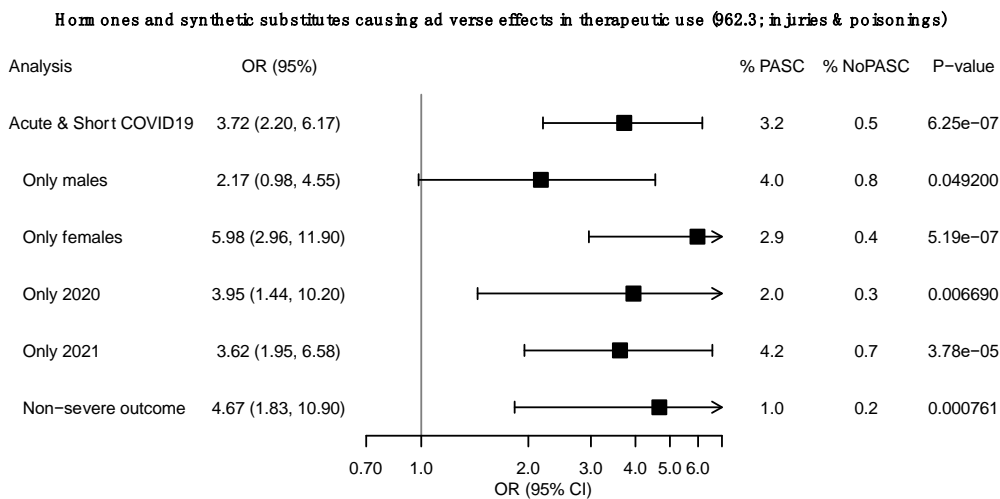

AK

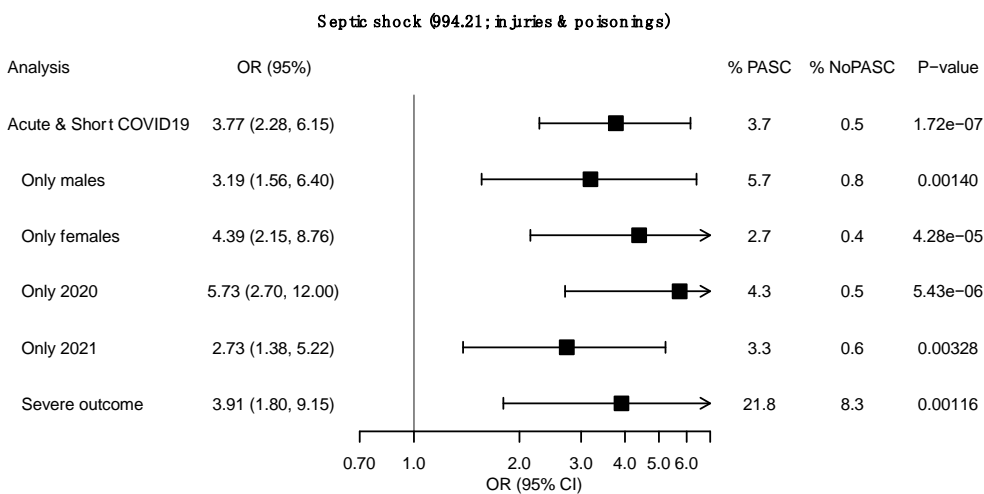

**Figure S4. A-Z, AA-AK.** Forest plots of the Acute & short COVID-19 Sensitivity analyses. Effect sizes and phecode frequencies in cases (PASC) and controls (No PASC) of significantly associated PheCodes are shown. Acute & short COVID-19: main analysis, only males, only females, COVID-19 positive in 2020, COVID-19 positive in 2021, non-severe COVID-19 outcome only, and severe COVID-

19 outcome. Of significantly associated parent/child phecodes only the phecode with the stronger association signal is shown. Sample sizes of each analysis can be found in **Table S5**.

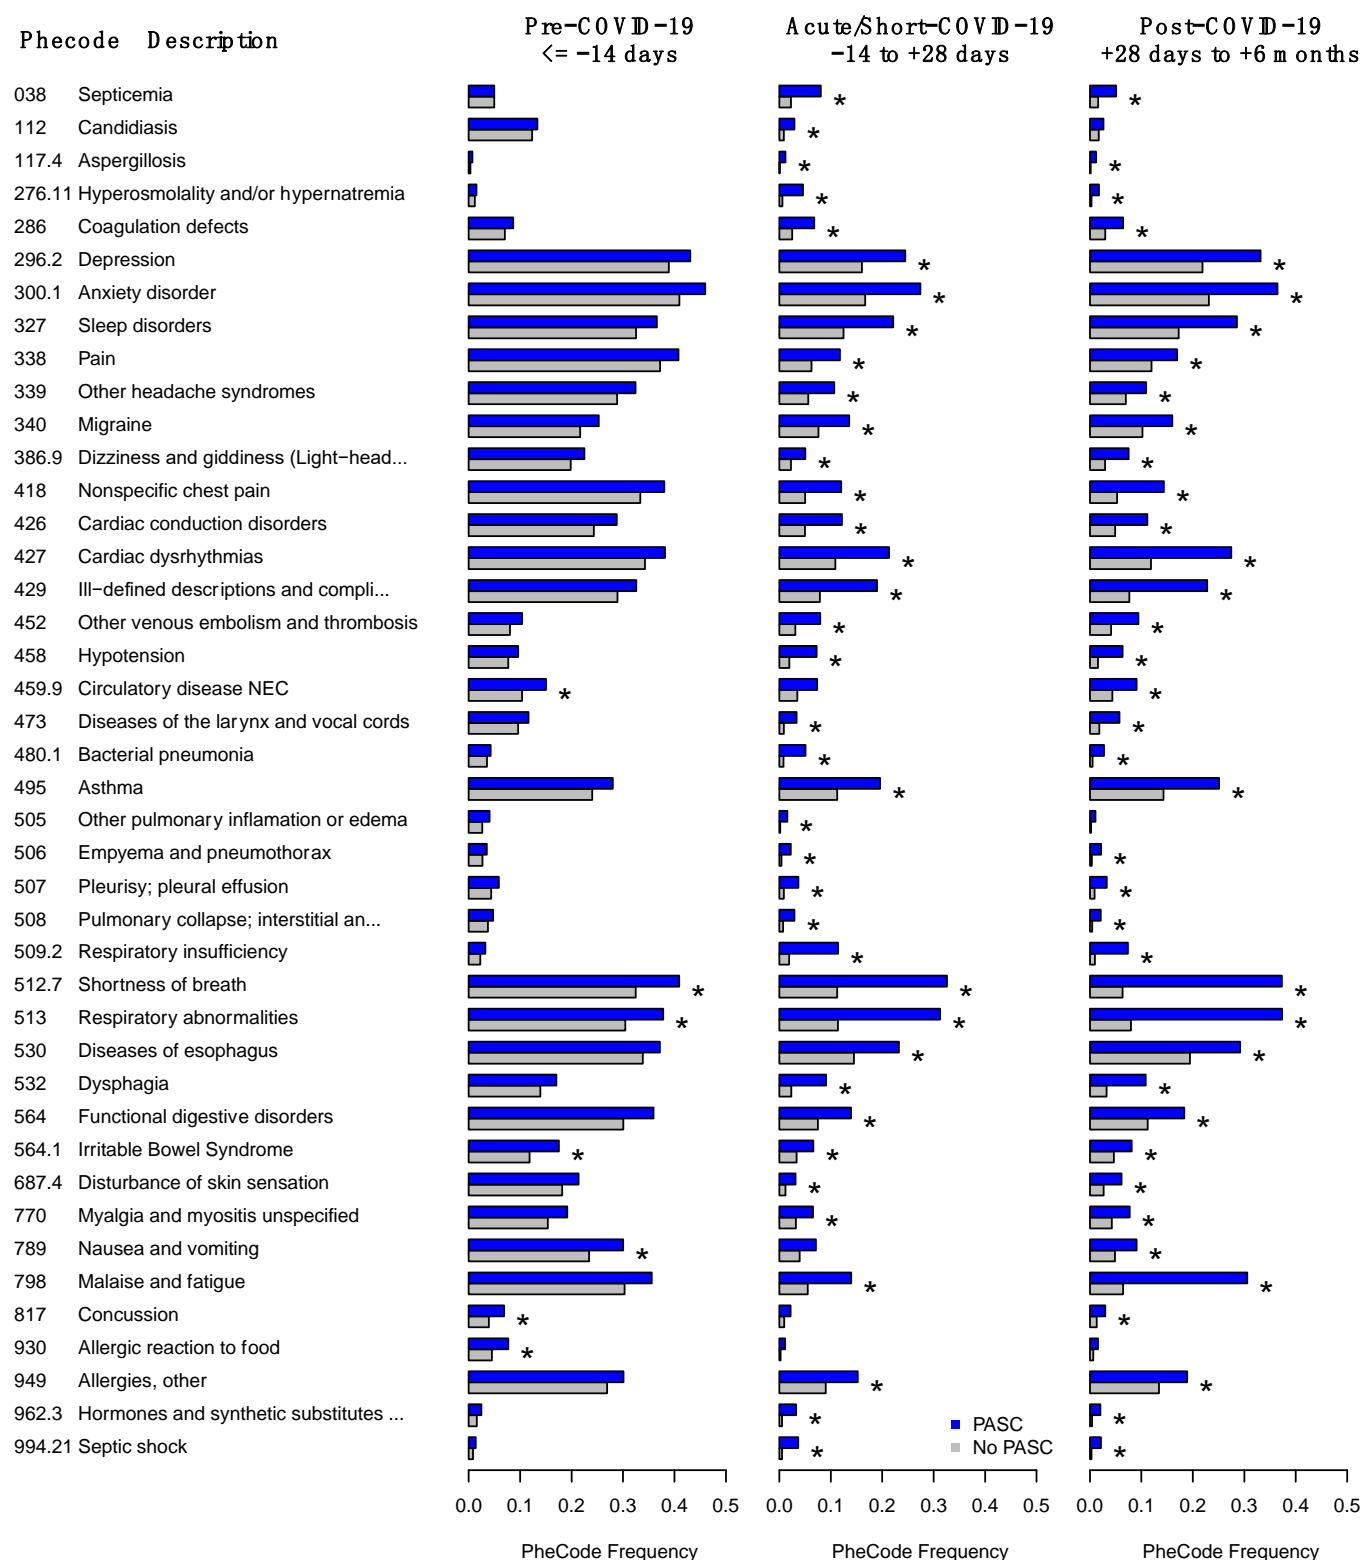

**Figure S5.** Comparison of PheCode prevalence during pre-COVID-19, acute/short-COVID-19, and post-COVID-19 periods in cases and controls. Only PheCodes that were significantly enriched among PASC patients in the pre-COVID-19 and/or acute/short-COVID-19 periods are shown. Of parent/child PheCodes only the phecode with the stronger association signal is shown. PheCodes that were

phenome-wide significant in the corresponding PheWAS are indicated with an asterisk. Phenome-wide significant enriched PheCodes are indicated by an asterisk.

**Table S1.** PASC Problem list.

| <b>Problem list description</b>                                       | <b>Mapped to ICD10 Code</b> |
|-----------------------------------------------------------------------|-----------------------------|
| Chronic post-COVID-19 syndrome                                        | B94.8                       |
| Shortness of breath with exposure to COVID-19 virus                   | R06.02                      |
| COVID-19 long hauler                                                  | U09.9                       |
| COVID-19 long hauler manifesting chronic anxiety                      | U09.9                       |
| COVID-19 long hauler manifesting chronic concentration deficit        | U09.9                       |
| COVID-19 long hauler manifesting chronic cough                        | U09.9                       |
| COVID-19 long hauler manifesting chronic dyspnea                      | U09.9                       |
| COVID-19 long hauler manifesting chronic fatigue                      | U09.9                       |
| COVID-19 long hauler manifesting chronic headache                     | U09.9                       |
| COVID-19 long hauler manifesting chronic joint pain                   | U09.9                       |
| COVID-19 long hauler manifesting chronic loss of smell                | U09.9                       |
| COVID-19 long hauler manifesting chronic loss of smell and taste      | U09.9                       |
| COVID-19 long hauler manifesting chronic loss of taste                | U09.9                       |
| COVID-19 long hauler manifesting chronic muscle pain                  | U09.9                       |
| COVID-19 long hauler manifesting chronic neurologic symptoms          | U09.9                       |
| COVID-19 long hauler manifesting chronic palpitations                 | U09.9                       |
| Long COVID                                                            | U09.9                       |
| Multiple persistent symptoms after COVID-19                           | U09.9                       |
| Persistent dyspnea after COVID-19                                     | U09.9                       |
| Persistent fatigue after COVID-19                                     | U09.9                       |
| Persistent neurologic symptoms after COVID-19                         | U09.9                       |
| Persistent shortness of breath after COVID-19                         | U09.9                       |
| Post covid-19 condition, unspecified                                  | U09.9                       |
| Post-acute COVID-19 syndrome                                          | U09.9                       |
| Post-acute sequelae of COVID-19 (PASC)                                | U09.9                       |
| Post-COVID chronic anxiety                                            | U09.9                       |
| Post-COVID chronic concentration deficit                              | U09.9                       |
| Post-COVID chronic cough                                              | U09.9                       |
| Post-COVID chronic dyspnea                                            | U09.9                       |
| Post-COVID chronic fatigue                                            | U09.9                       |
| Post-COVID chronic headache                                           | U09.9                       |
| Post-COVID chronic joint pain                                         | U09.9                       |
| Post-COVID chronic loss of smell                                      | U09.9                       |
| Post-COVID chronic loss of smell and taste                            | U09.9                       |
| Post-COVID chronic loss of taste                                      | U09.9                       |
| Post-COVID chronic muscle pain                                        | U09.9                       |
| Post-COVID chronic neurologic symptoms                                | U09.9                       |
| Post-COVID chronic palpitations                                       | U09.9                       |
| Post-COVID chronic shortness of breath                                | U09.9                       |
| Post-COVID syndrome                                                   | U09.9                       |
| Post-COVID-19 condition                                               | U09.9                       |
| Post-COVID-19 syndrome                                                | U09.9                       |
| Post-COVID-19 syndrome manifesting as chronic anxiety                 | U09.9                       |
| Post-COVID-19 syndrome manifesting as chronic concentration deficit   | U09.9                       |
| Post-COVID-19 syndrome manifesting as chronic cough                   | U09.9                       |
| Post-COVID-19 syndrome manifesting as chronic dyspnea                 | U09.9                       |
| Post-COVID-19 syndrome manifesting as chronic fatigue                 | U09.9                       |
| Post-COVID-19 syndrome manifesting as chronic headache                | U09.9                       |
| Post-COVID-19 syndrome manifesting as chronic joint pain              | U09.9                       |
| Post-COVID-19 syndrome manifesting as chronic loss of smell           | U09.9                       |
| Post-COVID-19 syndrome manifesting as chronic loss of smell and taste | U09.9                       |
| Post-COVID-19 syndrome manifesting as chronic loss of taste           | U09.9                       |
| Post-COVID-19 syndrome manifesting as chronic muscle pain             | U09.9                       |
| Post-COVID-19 syndrome manifesting as chronic neurologic symptoms     | U09.9                       |
| Post-COVID-19 syndrome manifesting as chronic palpitations            | U09.9                       |

|                                                                                |        |
|--------------------------------------------------------------------------------|--------|
| Post-COVID-19 syndrome manifesting as chronic shortness of breath              | U09.9  |
| COVID-19 long hauler manifesting chronic decreased mobility and endurance      | Z74.09 |
| Post-COVID chronic decreased mobility and endurance                            | Z74.09 |
| Post-COVID-19 syndrome manifesting as chronic decreased mobility and endurance | Z74.09 |

**Table S2.** PASC symptom and concurrent symptom mapping.

| PheCode | PheCode Description                                    | PSL Key Words                   | ICD10 Diagnosis mapped to PSL | Symptom described in Chen et al 2022                    |
|---------|--------------------------------------------------------|---------------------------------|-------------------------------|---------------------------------------------------------|
| 260.6   | Anorexia                                               | Appetite                        | R63.0                         | Appetite / Eating disorder                              |
| 292     | Neurological disorders                                 | Neurologic or cognitive deficit | R41                           | Memory problems / Concentration / Confusion / Brain fog |
| 296.2   | Depression                                             | Depression                      | F32                           | Depression                                              |
| 300.1   | Anxiety disorder                                       | Anxiety                         | F41                           | Anxiety                                                 |
| 327     | Sleep disorders                                        | Sleep apnea                     | G47                           | Sleep problems                                          |
| 338.2   | Chronic pain                                           | Chronic pain                    | G89.2                         | n/a                                                     |
| 339     | Any headache syndromes                                 | Headache                        | R51                           | Headache                                                |
| 340     | Migraine                                               | Migraine                        | G43                           | n/a                                                     |
| 350.6   | Disturbances of sensation of smell and taste           | Smell and taste                 | R43.8                         | Smell or Taste                                          |
| 386.9   | Dizziness and giddiness (Light-headedness and vertigo) | Dizziness                       | R42                           | Dizziness                                               |
| 418     | Nonspecific chest pain                                 | Chest pain                      | R07                           | Chest pain                                              |
| 427.7   | Tachycardia NOS                                        | Tachycardia                     | R00                           | Tachycardia                                             |
| 427.9   | Palpitations                                           | Palpitations                    | R00                           | n/a                                                     |
| 465.2   | Acute pharyngitis                                      | Sore throat                     | J02.9                         | Sore throat                                             |
| 473.4   | Voice disturbance                                      | Dysphonia                       | R49.0                         | n/a                                                     |
| 495     | Asthma                                                 | Asthma                          | J45                           | n/a                                                     |
| 496     | Chronic airway obstruction                             | COPD                            | J44                           | n/a                                                     |
| 512.7   | Shortness of breath                                    | Dyspnea                         | R06.0                         | Dyspnea                                                 |
| 512.8   | Cough                                                  | Cough                           | R05                           | Cough                                                   |
| 561     | Symptoms involving digestive system                    | Diarrhea                        | R19.7                         | Diarrhea                                                |
| 687.1   | Rash and other nonspecific skin eruption               | Rash                            | R21                           | n/a                                                     |
| 704.1   | Alopecia                                               | Hair loss                       | L65                           | Hair loss                                               |
| 745     | Pain in joint                                          | Joint pain                      | M25.5                         | Joint pain                                              |
| 760     | Back pain                                              | Back pain                       | M54                           | n/a                                                     |
| 770     | Myalgia and myositis unspecified                       | Myalgia                         | M79.1                         | Myalgia                                                 |
| 772.3   | Muscle weakness                                        | Muscle weakness                 | M62.81                        | n/a                                                     |
| 783     | Fever of unknown origin                                | Fever                           | R50                           | Fever                                                   |
| 785     | Abdominal pain                                         | Abdominal pain                  | R10                           | Abdominal pain                                          |
| 798     | Malaise and fatigue                                    | Fatigue                         | R53                           | Fatigue                                                 |

**Table S3.** Covariate summary and missingness in the unmatched and matched cohort (see Figure 2).

| <i>Standard Set of Covariates</i>               |                                 | Missingness,<br>n (%)          |                              |
|-------------------------------------------------|---------------------------------|--------------------------------|------------------------------|
| Covariate                                       | Data Type                       | Unmatched cohort<br>n = 63,675 | Matched cohort<br>n = 18,929 |
| Age at positive COVID-19 test/diagnosis         | Continuous                      | 0 (0)                          | 0 (0) <sup>e</sup>           |
| Gender                                          | Binary                          | 5 (0)                          | 0 (0) <sup>e</sup>           |
| Self-reported Race / Ethnicity <sup>a</sup>     | Categorical                     | 0 (0)                          | 0 (0) <sup>e</sup>           |
| Elixhauser Score (AHRQ)                         | Continuous                      | 0 (0)                          | 0 (0)                        |
| NDI                                             | Categorical (quartiles)         | 5,793 (9.1)                    | 1,335 (7.1)                  |
| Population density                              | Categorical (quartiles)         | 5,793 (9.1)                    | 1,335 (7.1)                  |
| Health Care Worker Status                       | Binary                          | 0 (0) <sup>f</sup>             | 0 (0) <sup>f</sup>           |
| Severity <sup>b</sup>                           | Binary                          | 0 (0) <sup>f</sup>             | 0 (0) <sup>f</sup>           |
| Vaccination status at time of test <sup>c</sup> | Categorical                     | 0 (0) <sup>f</sup>             | 0 (0) <sup>f</sup>           |
| <i>Analysis dependent Covariates</i>            |                                 |                                |                              |
| Analysis                                        | Covariate                       | Data Type                      | Missingness, n (%)           |
| Pre-Pandemic PheWAS                             | Pre-Pandemic Years in EHR       | Continuous                     | 1,360 (2.1) 99 (0.5)         |
| Pre-COVID-19 PheWAS                             | Pre-Test Years in EHR           | Continuous                     | 0 (0) 0 (0) <sup>e</sup>     |
| Acute & Short COVID-19 PheWAS                   | Post-COVID-19-Test Years in EHR | Continuous                     | 0 (0) 0 (0) <sup>e</sup>     |
| Post-COVID-19 Symptom PheWAS                    | Post-COVID-19-Test Years in EHR | Continuous                     | 0 (0) 0 (0) <sup>e</sup>     |

<sup>a</sup> Self-reported Race / Ethnicity factor levels: Caucasian/Non-Hispanic, African American/Non-Hispanic, Other Race or Ethnicity, and Unknown Race or Ethnicity. <sup>b</sup> mild: asymptomatic/non-hospitalized; severe: hospitalized, ICU stay or deceased. <sup>c</sup> unvaccinated, partially vaccinated, fully vaccinated, boosted. <sup>e</sup> complete data was requirement for matching. <sup>f</sup> based on available EHR documentation (“documented” versus “not documented or unknown”); actual missingness unknown.

**Table S4.** Main and sensitivity PheWAS. Each analysis only includes individual who were COVID-19 positive for the first time before 2022.

| Analysis                    | Phenome Description<br>(relative to index date)                       | n<br>PASC | n<br>No PASC<br>(Matched) | n PheCodes* |
|-----------------------------|-----------------------------------------------------------------------|-----------|---------------------------|-------------|
| <b>Main Analysis</b>        | Pre-existing conditions / pre-COVID-19 symptoms<br>(before -14 days)  | 1,212     | 11,919                    | 1,405       |
|                             | Females only                                                          | 793       | 7,882                     | 1,237       |
|                             | Males only                                                            | 419       | 4,037                     | 928         |
|                             | 1. Positive in 2020                                                   | 381       | 3,671                     | 1,013       |
| <b>Sensitivity Analyses</b> | 1. Positive in 2021                                                   | 831       | 8,248                     | 1,285       |
|                             | Asymptomatic / mild COVID-19 outcome                                  | 1,009     | 9,393                     | 1,273       |
|                             | Severe COVID-19 outcome                                               | 203       | 204                       | 944         |
|                             | Max 2 years before COVID-19 test                                      | 1,212     | 11,919                    | 1,061       |
|                             | Pre-existing conditions before pandemic<br>(before 2020)              | 1,085     | 10,533                    | 1,347       |
| <b>Main Analysis</b>        | Acute / short COVID-19 period symptoms<br>(between -14 and + 28 days) | 874       | 8,671                     | 664         |
|                             | Females only                                                          | 578       | 5,766                     | 510         |
|                             | Males only                                                            | 296       | 2,905                     | 365         |
| <b>Sensitivity Analyses</b> | 1. Positive in 2020                                                   | 368       | 3,623                     | 397         |
|                             | 2. Positive in 2021                                                   | 506       | 5,048                     | 504         |
|                             | Asymptomatic / Mild COVID-19                                          | 724       | 6,799                     | 454         |
|                             | Severe COVID-19                                                       | 150       | 160                       | 419         |
| <b>Main Analysis</b>        | Post-COVID-19 symptoms<br>(between +28 days and +6 months)            | 1,256     | 12,492                    | 961         |

\* PheCode prevalence  $\geq 5$  among individuals with and without PASC (complete case analysis).

**Table S5.** Concurrent diagnoses on day of the first PASC diagnosis. Only diagnoses that matched the 24 listed categories are shown.

| Symptoms                                               | n   | % with<br>Unspecified PASC<br>(n = 1,724) | % Without<br>Unspecified PASC<br>(n = 1,362) |
|--------------------------------------------------------|-----|-------------------------------------------|----------------------------------------------|
| Shortness of breath                                    | 469 | 27.2                                      | 34.4                                         |
| Anxiety disorder                                       | 417 | 24.2                                      | 30.6                                         |
| Malaise and fatigue                                    | 388 | 22.5                                      | 28.5                                         |
| Depression                                             | 370 | 21.5                                      | 27.2                                         |
| Sleep disorders                                        | 346 | 20.1                                      | 25.4                                         |
| Asthma                                                 | 321 | 18.6                                      | 23.6                                         |
| Other headache syndromes                               | 291 | 16.9                                      | 21.4                                         |
| Migraine                                               | 188 | 10.9                                      | 13.8                                         |
| Cough                                                  | 177 | 10.3                                      | 13.0                                         |
| Pain in joint                                          | 172 | 10.0                                      | 12.6                                         |
| Back pain                                              | 158 | 9.2                                       | 11.6                                         |
| Neurological disorders                                 | 155 | 9.0                                       | 11.4                                         |
| Nonspecific chest pain                                 | 143 | 8.3                                       | 10.5                                         |
| Chronic pain                                           | 132 | 7.7                                       | 9.7                                          |
| Tachycardia NOS                                        | 114 | 6.6                                       | 8.4                                          |
| Myalgia and myositis unspecified                       | 115 | 6.7                                       | 8.4                                          |
| Chronic airway obstruction                             | 101 | 5.9                                       | 7.4                                          |
| Symptoms involving digestive system                    | 100 | 5.8                                       | 7.3                                          |
| Abdominal pain                                         | 91  | 5.3                                       | 6.7                                          |
| Palpitations                                           | 66  | 3.8                                       | 4.8                                          |
| Rash and other nonspecific skin eruption               | 65  | 3.8                                       | 4.8                                          |
| Dizziness and giddiness (Light-headedness and vertigo) | 64  | 3.7                                       | 4.7                                          |
| Fever of unknown origin                                | 46  | 2.7                                       | 3.4                                          |
| Disturbances of sensation of smell and taste           | 44  | 2.6                                       | 3.2                                          |
| Voice disturbance                                      | 23  | 1.3                                       | 1.7                                          |
| Muscle weakness                                        | 15  | 0.9                                       | 1.1                                          |
| Acute pharyngitis                                      | 12  | 0.7                                       | 0.9                                          |
| Anorexia                                               | 11  | 0.6                                       | 0.8                                          |
| Alopecia                                               | 8   | 0.5                                       | 0.6                                          |
| Unspecified PASC                                       | 362 | 21.0                                      | 0.0                                          |

**Table S6.** Enrichment 29 known PASC symptoms among post-COVID-19 diagnoses (observed between +28 days and 6 months after being COVID-19 positive) in PASC cases compared to “No PASC” controls.

| PheCode | PheCode Description                                    | PheCode Category    | PheCode Frequency [PASC] | PheCode Frequency [No PASC] | OR (95% CI)       | P-value   | Significance Level |
|---------|--------------------------------------------------------|---------------------|--------------------------|-----------------------------|-------------------|-----------|--------------------|
| 512.7   | Shortness of breath                                    | respiratory         | 425 / 1139 (37.3)        | 744 / 11752 ( 6.3)          | 9.03 (7.77, 10.5) | 2.94E-181 | phenome-wide       |
| 798     | Malaise and fatigue                                    | symptoms            | 384 / 1256 (30.6)        | 803 / 12492 ( 6.4)          | 6.17 (5.33, 7.14) | 2.32E-132 | phenome-wide       |
| 512.8   | Cough                                                  | respiratory         | 136 / 850 (16.0)         | 457 / 11465 ( 4.0)          | 4.39 (3.54, 5.41) | 1.61E-42  | phenome-wide       |
| 292     | Neurological disorders                                 | mental disorders    | 160 / 1228 (13.0)        | 439 / 12274 ( 3.6)          | 3.57 (2.91, 4.35) | 8.85E-36  | phenome-wide       |
| 427.7   | Tachycardia NOS                                        | circulatory system  | 118 / 1003 (11.8)        | 286 / 11112 ( 2.6)          | 4.39 (3.45, 5.56) | 5.58E-34  | phenome-wide       |
| 418     | Nonspecific chest pain                                 | circulatory system  | 180 / 1253 (14.4)        | 660 / 12487 ( 5.3)          | 2.87 (2.39, 3.44) | 2.98E-30  | phenome-wide       |
| 427.9   | Palpitations                                           | circulatory system  | 97 / 982 ( 9.9)          | 306 / 11132 ( 2.7)          | 3.88 (3.03, 4.92) | 2.02E-28  | phenome-wide       |
| 300.1   | Anxiety disorder                                       | mental disorders    | 406 / 1114 (36.4)        | 2628 / 11368 (23.1)         | 1.95 (1.70, 2.23) | 4.55E-22  | phenome-wide       |
| 350.6   | Disturbances of sensation of smell and taste           | neurological        | < 50 / 1172 ( 3.0)       | < 50 / 12091 ( 0.4)         | 7.69 (4.93, 11.9) | 4.51E-21  | phenome-wide       |
| 327     | Sleep disorders                                        | neurological        | 358 / 1253 (28.6)        | 2152 / 12478 (17.2)         | 1.92 (1.67, 2.20) | 1.11E-20  | phenome-wide       |
| 495     | Asthma                                                 | respiratory         | 300 / 1196 (25.1)        | 1742 / 12171 (14.3)         | 1.98 (1.72, 2.29) | 1.36E-20  | phenome-wide       |
| 386.9   | Dizziness and giddiness (Light-headedness and vertigo) | sense organs        | 94 / 1252 ( 7.5)         | 367 / 12434 ( 3.0)          | 2.68 (2.10, 3.39) | 3.65E-16  | phenome-wide       |
| 296.2   | Depression                                             | mental disorders    | 351 / 1059 (33.1)        | 2448 / 11188 (21.9)         | 1.79 (1.55, 2.07) | 8.83E-16  | phenome-wide       |
| 783     | Fever of unknown origin                                | symptoms            | 73 / 1256 ( 5.8)         | 196 / 12492 ( 1.6)          | 3.15 (2.34, 4.19) | 6.41E-15  | phenome-wide       |
| 473.4   | Voice disturbance                                      | respiratory         | < 50 / 958 ( 4.3)        | 113 / 10361 ( 1.1)          | 3.43 (2.33, 4.94) | 5.86E-11  | phenome-wide       |
| 340     | Migraine                                               | neurological        | 190 / 1187 (16.0)        | 1224 / 12007 (10.2)         | 1.75 (1.47, 2.08) | 1.74E-10  | phenome-wide       |
| 770     | Myalgia and myositis unspecified                       | symptoms            | 97 / 1256 ( 7.7)         | 532 / 12492 ( 4.3)          | 1.87 (1.48, 2.35) | 9.22E-08  | phenome-wide       |
| 785     | Abdominal pain                                         | symptoms            | 159 / 1256 (12.7)        | 1003 / 12492 ( 8.0)         | 1.61 (1.34, 1.93) | 2.80E-07  | phenome-wide       |
| 760     | Back pain                                              | symptoms            | 225 / 1256 (17.9)        | 1555 / 12492 (12.4)         | 1.51 (1.28, 1.76) | 4.45E-07  | phenome-wide       |
| 496     | Chronic airway obstruction                             | respiratory         | 92 / 988 ( 9.3)          | 507 / 10936 ( 4.6)          | 1.93 (1.49, 2.49) | 4.92E-07  | phenome-wide       |
| 745     | Pain in joint                                          | musculoskeletal     | 219 / 1256 (17.4)        | 1537 / 12492 (12.3)         | 1.51 (1.28, 1.77) | 5.62E-07  | phenome-wide       |
| 772.3   | Muscle weakness                                        | symptoms            | < 50 / 1221 ( 2.9)       | 103 / 12252 ( 0.8)          | 2.67 (1.76, 3.95) | 1.11E-06  | phenome-wide       |
| 704.1   | Alopecia                                               | dermatologic        | < 50 / 1238 ( 3.5)       | 177 / 12339 ( 1.4)          | 2.31 (1.62, 3.22) | 1.39E-06  | phenome-wide       |
| 339     | Other headache syndromes                               | neurological        | 122 / 1119 (10.9)        | 808 / 11591 ( 7.0)          | 1.65 (1.34, 2.03) | 2.21E-06  | phenome-wide       |
| 465.2   | Acute pharyngitis                                      | respiratory         | < 50 / 1221 ( 2.8)       | 162 / 12232 ( 1.3)          | 2.27 (1.53, 3.28) | 1.66E-05  | phenome-wide       |
| 338.2   | Chronic pain                                           | neurological        | 164 / 1207 (13.6)        | 1122 / 12121 ( 9.3)         | 1.49 (1.24, 1.78) | 1.87E-05  | phenome-wide       |
| 687.1   | Rash and other nonspecific skin eruption               | dermatologic        | 78 / 1183 ( 6.6)         | 472 / 12148 ( 3.9)          | 1.71 (1.32, 2.19) | 2.71E-05  | phenome-wide       |
| 561     | Symptoms involving digestive system                    | digestive           | < 50 / 981 ( 1.9)        | 139 / 10676 ( 1.3)          | 1.56 (0.93, 2.47) | 0.069     | n.s.               |
| 260.6   | Anorexia                                               | endocrine/metabolic | < 50 / 1047 ( 0.8)       | < 50 / 11384 ( 0.4)         | 1.81 (0.79, 3.70) | 0.106     | n.s.               |

Notes: phenome-wide:  $P < 0.05/961$  tested PheCodes ( $P < 5.1E-05$ ); n.s.: not significant.

**Table S7.** PheRS Evaluation in the testing data (COVID-19 positive in 2022). PheRS1\* was based on phecodes that reached  $P < 1-E3$  in the PheWAS with the pre-COVID-19 training data (1,256 cases and 11,674 controls; COVID-19 positive in 2020/2021), while PheRS2\* was based on phecodes that reached  $P < 1-E3$  in the PheWAS with the acute & short COVID-19 training data (874 cases and 8,144 controls; COVID-19 positive in 2020/2021 & at least 28 days between first COVID-19 and first PASC diagnosis). Underlying weights can be found in **File S1J** and **Table S8**.

| Predictor        | Testing Data |            | AAUC <sup>a</sup><br>95% CI | Pseudo-R <sup>2</sup> <sup>b</sup> | Brier Score      |
|------------------|--------------|------------|-----------------------------|------------------------------------|------------------|
|                  | n Cases      | n Controls |                             |                                    |                  |
| PheRS1*          | 349          | 3248       | 0.545 (0.514, 0.576)        | n/a <sup>c</sup>                   | n/a <sup>c</sup> |
| PheRS1*          |              |            | 0.551 (0.495, 0.611)        | 0.0086                             | 0.0857           |
| PheRS2*          | 123          | 1154       | 0.595 (0.540, 0.653)        | 0.0439                             | 0.0830           |
| PheRS1 & PheRS2* |              |            | 0.601 (0.548, 0.658)        | 0.0435                             | 0.0831           |

<sup>a</sup> Adjusted for age at index date, gender, race/ethnicity, Elixhauser Score, population density, NDI, health care worker status, vaccination status, pre-test years in EHR, and severity. <sup>b</sup> Nagelkerke [Cragg and Uhler]). <sup>c</sup> not applicable, only useful in evaluating multiple models predicting the same outcome on the same dataset.

**Table S8.** Weights for combining PheRS1 and PheRS2 or PheRS1\* and PheRS2\*. PheRS were standardized (mean =0 and sd = 1) before calculating the weights and before calculating the combined PheRSs.

| PheRS Combination          | Predictor | Weight* |
|----------------------------|-----------|---------|
| PheRS1 & PheRS2 Combined   | PheRS1    | 0.08289 |
|                            | PheRS2    | 0.52371 |
| PheRS1* & PheRS2* Combined | PheRS1*   | 0.08267 |
|                            | PheRS2*   | 0.51564 |

**Disclaimer/Publisher's Note:** The statements, opinions and data contained in all publications are solely those of the individual author(s) and contributor(s) and not of MDPI and/or the editor(s). MDPI and/or the editor(s) disclaim responsibility for any injury to people or property resulting from any ideas, methods, instructions or products referred to in the content.
